# Supplementary material for: γ-Sultam-cored N,N-ligands in the ruthenium(ii)-catalyzed asymmetric transfer hydrogenation of aryl ketones
Source: Royal Society of Chemistry journal article supplement (doi:10.1039/c5ob02352a), 2016-01-01
Supplement: c5ob02352a1.pdf [file c5ob02352a1.pdf]

## Supporting Information

### $\gamma$ -Sultam-cored N,N-ligands in ruthenium(II)-catalyzed asymmetric transfer hydrogenation of aryl ketones

Slavko Rast,<sup>a</sup> Barbara Modec,<sup>b</sup> Michel Stephan<sup>a,c</sup> and Barbara Mohar\*<sup>a</sup>

<sup>a</sup> National Institute of Chemistry, Hajdrihova 19, 1001 Ljubljana, Slovenia

<sup>b</sup> Faculty of Chemistry and Chemical Technology, University of Ljubljana, Večna pot 113, 1000 Ljubljana, Slovenia

<sup>c</sup> Present address: PhosPhoenix SARL, 115, rue de l'Abbé Groult, 75015 Paris, France

E-mail: [barbara.mohar@ki.si](mailto:barbara.mohar@ki.si)

## Contents

|                                                                           |     |
|---------------------------------------------------------------------------|-----|
| 1. Determination of X-ray structures.....                                 | S1  |
| 2. GC & HPLC chromatograms.....                                           | S4  |
| 3. <sup>1</sup> H NMR and <sup>13</sup> C NMR spectra .....               | S14 |
| 4. <sup>1</sup> H, <sup>13</sup> C-HMBC analysis of <i>trans</i> -4 ..... | S27 |
| 5. <sup>1</sup> H, <sup>13</sup> C-HMBC analysis of <i>syn</i> -6 .....   | S28 |

### 1. Determination of X-ray structures

Data for crystals of [*syn*-(3*S*,1'*R*)-6]·(*S*)-CSA, [*anti*-(3*R*,1'*R*)-6]·(*S*)-CSA, and racemic *trans*-5 were collected using monochromated Mo-K $\alpha$  radiation ( $\lambda = 0.71073$  Å) and for crystals of **S7-reduced** (**S7** ATH major reduction product) using Cu-K $\alpha$  radiation ( $\lambda = 1.54184$  Å). The coordinates of some or all of the non-hydrogen atoms were found *via* direct methods using the structure solution SHELXS-97 program.<sup>1</sup> Positions of the remaining non-hydrogen atoms were located by using a combination of least-squares refinement and difference Fourier maps in the SHELXL-97 program.<sup>1</sup> Except hydrogen atoms, all atoms were refined anisotropically. The absolute configuration of [*syn*-(3*S*,1'*R*)-6]·(*S*)-CSA and [*anti*-(3*R*,1'*R*)-6]·(*S*)-CSA were determined by refinement of the completed model together with the Flack *x* parameter<sup>2</sup> which refined to value of 0.00(8) and -0.06(5), respectively, and as such confirmed that the refined coordinates represent in both cases the true enantiomorph. For **S7-reduced**, the value of the Flack *x* parameter refined to 0.1(3). In this case, the absolute configuration of one chiral center, *i.e.* C(1), was known prior to the analysis. Figures depicting the structures were prepared by Ortep3<sup>3</sup> and Mercury<sup>4</sup>. The supplementary crystallographic data (atomic coordinates, anisotropic displacement parameters, and extended lists of interatomic distances and angles) are contained in cif files.

1 G. M. Sheldrick, *SHELX-97. Programs for Crystal Structure Analysis*; University of Göttingen: Göttingen, Germany, 1998.

2 H. D. Flack, *Acta Crystallogr.*, 1983, **A39**, 876–881.

3 L. Farrugia, *J. Appl. Crystallogr.*, 1997, **30**, 565.

4 C.F. Macrae, P. R. Edgington, P. McCabe, E. Pidcock, G. P. Shields, R. Taylor, M. Towler and J. van de Streek, *J. Appl. Cryst.*, 2006, **39**, 453.

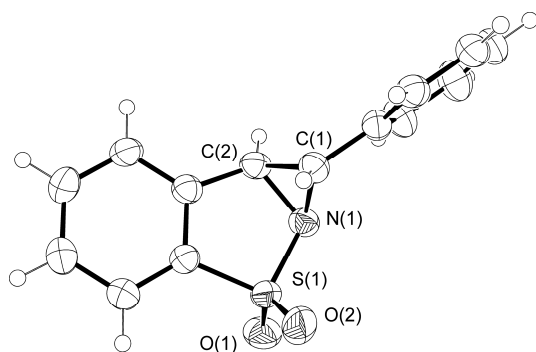

**Fig. S1** ORTEP drawing of racemic *trans*-5 at the 50% probability level (only one enantiomorph is shown).  $C_{14}H_{11}NO_2S$ ,  $F_w$  257.30, triclinic, space group  $P\bar{1}$  (No. 2),  $a = 8.1388(2)$ ,  $b = 9.6226(2)$ ,  $c = 9.7540(2)$  Å,  $\alpha = 117.1972(15)$ ,  $\beta = 112.3062(17)$ ,  $\gamma = 92.1331(15)^\circ$ ,  $V = 607.64(2)$  Å<sup>3</sup>,  $Z = 2$ ,  $T = 293(2)$  K,  $d_{\text{calcd}} = 1.406$  g cm<sup>-3</sup>,  $\mu = 0.258$  mm<sup>-1</sup>, 4740 measured reflections, 2729 unique reflections ( $R_{\text{int}} = 0.0141$ ), 171 refined parameters,  $R_1 [I > 2\sigma(I)] = 0.0347$ ,  $wR2$  [all data] = 0.0958.

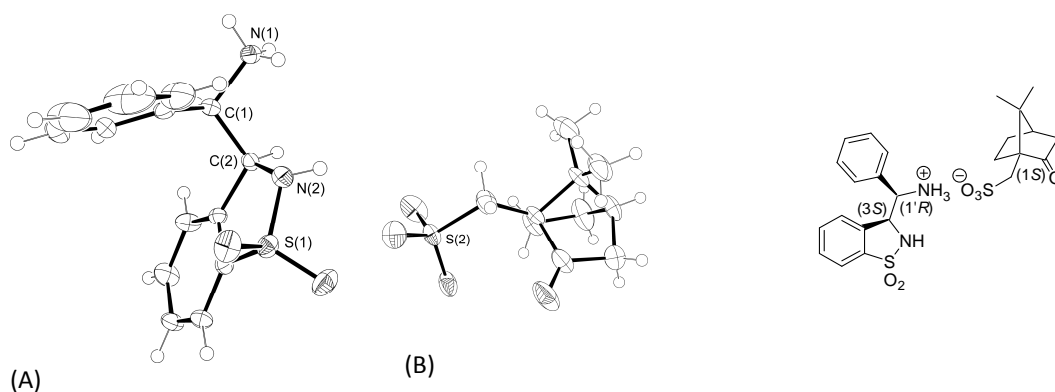

**Fig. S2** ORTEP drawing of [*syn*-(3*S*,1'*R*)-6]·(*S*)-CSA at the 50% probability level; (A) cationic part, (B) anionic part.

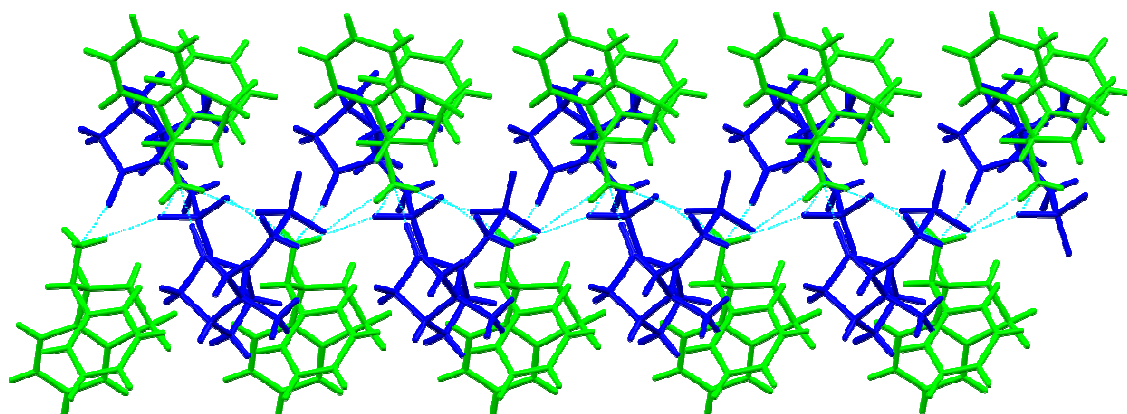

**Fig. S3** Hydrogen-bonding pattern in [*syn*-(3*S*,1'*R*)-6]·(*S*)-CSA: each  $NH_3^+$  group is engaged in H-bonds with three  $SO_3^-$  moieties with  $N\cdots O$  contacts in the 2.979(3)–2.997(4) Å range.<sup>5</sup> Infinite chains which run parallel to *b*-axis are thus formed. Color code: green - cations, blue - anions.

<sup>5</sup> The sum of the van der Waals radii for O atoms is 3.07 Å. Data were taken from B. Douglas, D. McDaniel and J. Alexander, *Concepts and Models of Inorganic Chemistry*, 3<sup>rd</sup> Ed.; John Wiley and Sons: New York, 1994; p. 102.

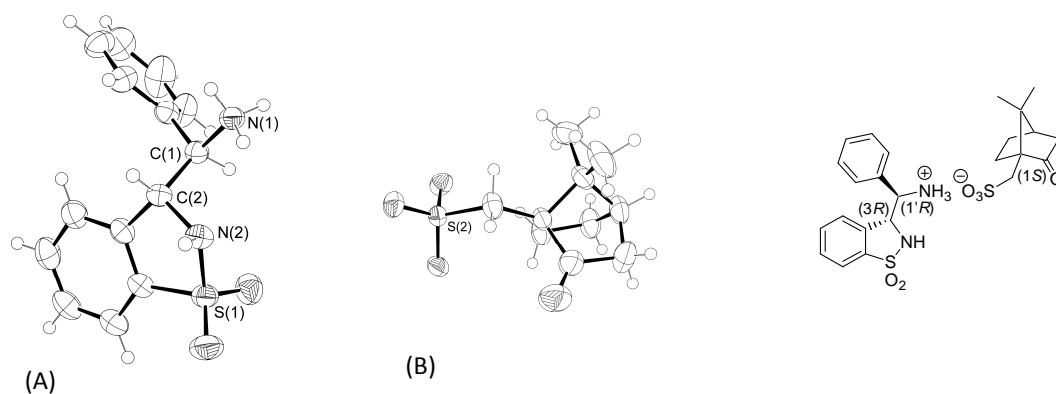

**Fig. S4** ORTEP drawing of  $[anti-(3R,1'R)-6] \cdot (S)\text{-CSA}$  at the 50% probability level; (A) cationic part, (B) anionic part.

Structural similarities exist between  $[anti-(3R,1'R)-6] \cdot (S)\text{-CSA}$  and  $[syn-(3S,1'R)-6] \cdot (S)\text{-CSA}$ . Both crystallize in monoclinic space group  $P 2_1$  with alike packing arrangement. Hydrogen bonds between  $\text{NH}_3^+$  and  $\text{SO}_3^-$  groups in  $[anti-(3R,1'R)-6] \cdot (S)\text{-CSA}$  also link cations and anions into infinite chains which run parallel to  $b$ -axis. The respective  $\text{N} \cdots \text{O}$  contacts in  $[anti-(3R,1'R)-6] \cdot (S)\text{-CSA}$ , *i.e.*, 2.835(2)–2.861(2) Å, are slightly shorter than those observed for  $[syn-(3S,1'R)-6] \cdot (S)\text{-CSA}$ .

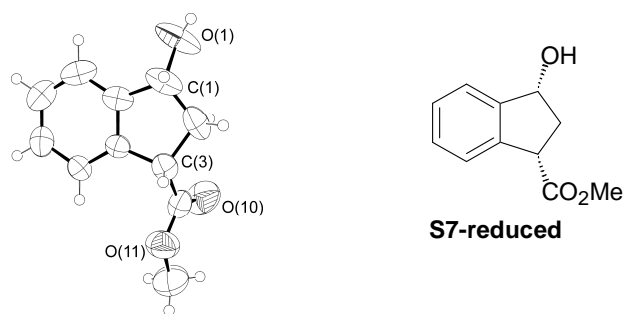

**Fig. S5** ORTEP drawing of **S7** ATH major reduction product at the 50% probability level.  $\text{C}_{11}\text{H}_{12}\text{O}_3$ ,  $F_w$  192.21, orthorhombic, space group  $P 2_12_12_1$  (No. 19),  $a = 4.79020(10)$ ,  $b = 12.6722(2)$ ,  $c = 16.8843(3)$  Å,  $V = 1024.92(3)$  Å<sup>3</sup>,  $Z = 4$ ,  $T = 293(2)$  K,  $d_{\text{calcd}} = 1.246$  g cm<sup>-3</sup>,  $\mu = 0.745$  mm<sup>-1</sup>, 17698 measured reflections, 2070 unique reflections ( $R_{\text{int}} = 0.0331$ ), 141 refined parameters,  $R_1 [I > 2\sigma(I)] = 0.0418$ ,  $wR2$  [all data] = 0.1206.

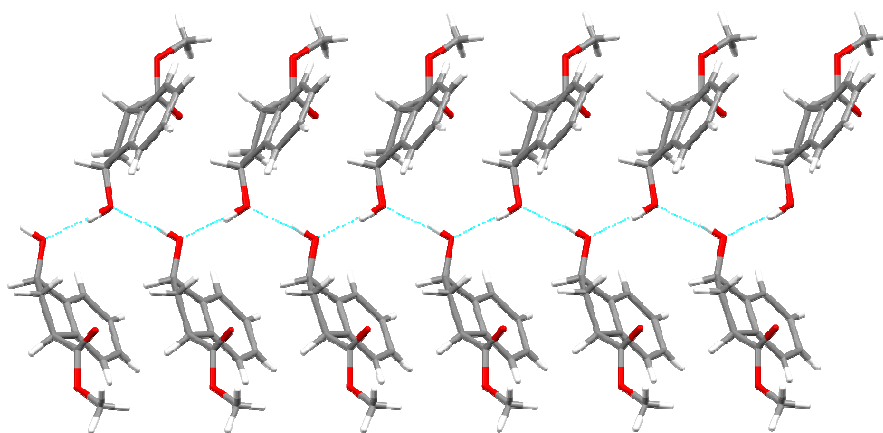

**Fig. S6** In **S7-reduced**, the hydroxyl groups are engaged in H-bonds. Each molecule forms two H-bonds with two adjacent molecules. The respective  $\text{O} \cdots \text{O}$  contacts are 2.6702(12) Å.<sup>5</sup> Infinite chains are formed thereby. The chains propagate along  $a$ -axis.

## 2. GC & HPLC chromatograms

**(R)-1-Phenylethanol.** Ee was determined by chiral GC analysis<sup>6</sup> on ChiralSil-DEX CB column (25m×0.25mm), 120 °C (isothermal),  $t_R$ : 4.6 min (R), 4.8 min (S).

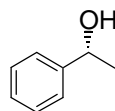

77.8% ee:

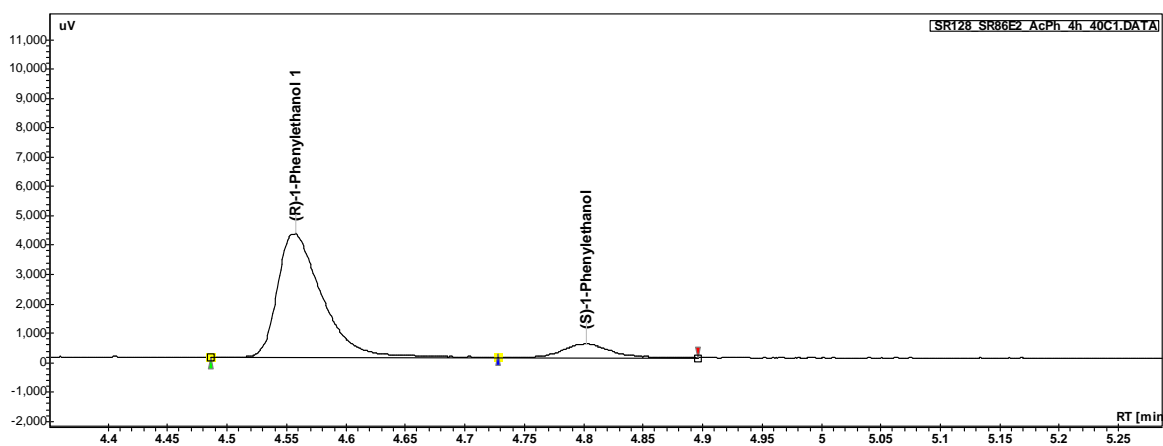

| Peak  | Name                | Time [Min] | Height [uV] | Area [uV.Min] | Area % [%] |
|-------|---------------------|------------|-------------|---------------|------------|
| 1     | (R)-1-Phenylethanol | 4.56       | 4222.1      | 185.5         | 88.903     |
| 2     | (S)-1-Phenylethanol | 4.8        | 479.4       | 23.2          | 11.097     |
| Total |                     |            | 4701.5      | 208.7         | 100        |

Racemate:

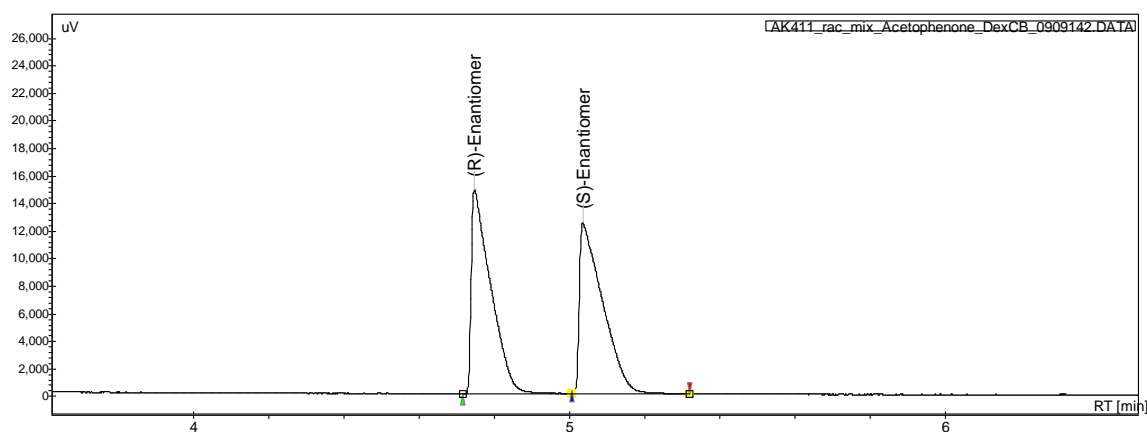

| Peak  | Name           | Time [Min] | Height [uV] | Area [uV.Min] | Area % |
|-------|----------------|------------|-------------|---------------|--------|
| 1     | (R)-Enantiomer | 4.75       | 14823.3     | 888.1         | 50.007 |
| 2     | (S)-Enantiomer | 5.04       | 12434.6     | 887.9         | 49.993 |
| Total |                |            | 27257.8     | 1776          | 100    |

6 For chiral GC analysis, see: A. Kišić, M. Stephan and B. Mohar, *Adv. Synth. Catal.*, 2015, **357**, 2540–2546.

**Ethyl (R)-3-hydroxy-3-phenylpropionate.** Ee was determined by chiral GC analysis<sup>7</sup> on Chiralsil-DEX CB (25m×0.25mm), 140 °C (isothermal); racemate,  $t_R$ : 14.6 min (S), 14.9 min (R).

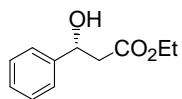

92.2% ee:

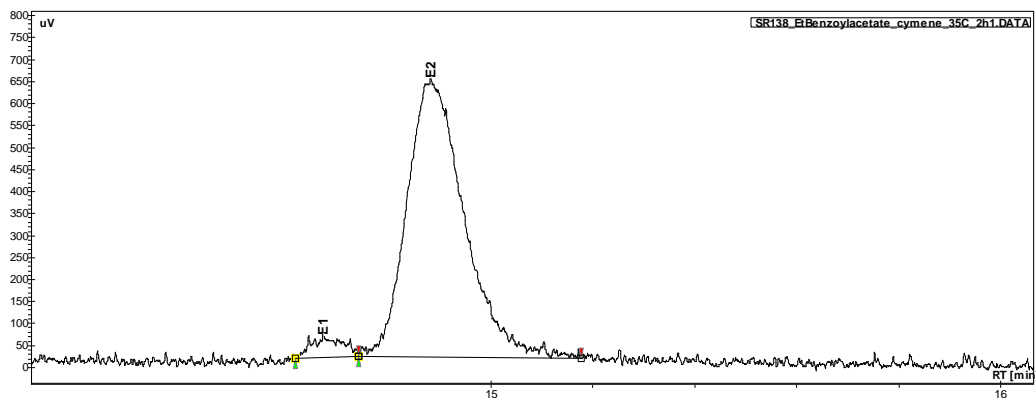

| Peak  | Name | Time [Min] | Height [uV] | Area [uV.Min] | Area % [%] |
|-------|------|------------|-------------|---------------|------------|
| 1     | (S)  | 14.67      | 46          | 3.3           | 3.897      |
| 2     | (R)  | 14.88      | 632.8       | 82.3          | 96.103     |
| Total |      |            | 678.9       | 85.7          | 100        |

59% ee (S):

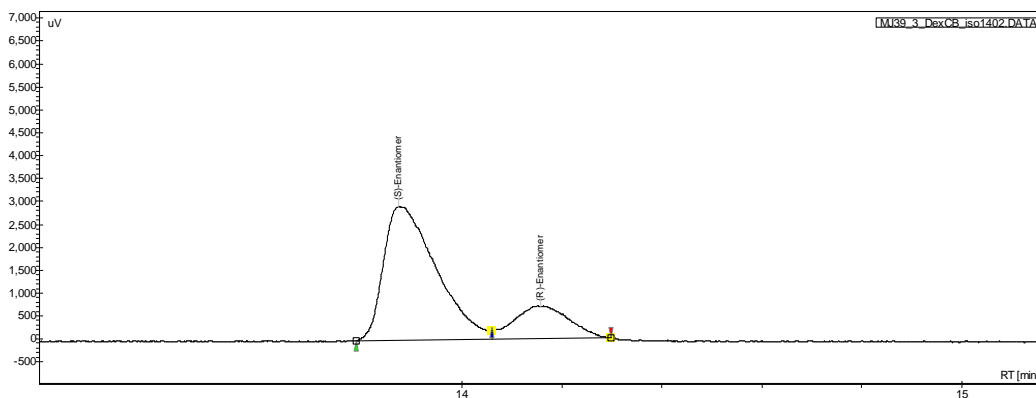

| Peak  | Name           | Time [Min] | Height [uV] | Area [uV.Min] | Area % [%] |
|-------|----------------|------------|-------------|---------------|------------|
| 1     | (S)-Enantiomer | 13.88      | 2920.7      | 355.4         | 79.466     |
| 2     | (R)-Enantiomer | 14.16      | 711.8       | 91.8          | 20.534     |
| Total |                |            | 3632.5      | 447.3         | 100        |

<sup>7</sup> For chiral GC analysis, see: D. Šterk, M.S. Stephan and B. Mohar, *Tetrahedron: Asymmetry*, 2002, **13**, 2605–2608.

**(R)-1-Indanol.** Ee was determined by chiral HPLC analysis on Chiralcel OD column (25 cm). Eluent hexane/2-ProOH = 98:2, flow rate 1.0 mL/min,  $\lambda = 254$  nm,  $t_R$ : 22.6 min (S), 26.2 min (R).<sup>6</sup>

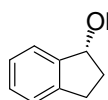

98.8% ee:

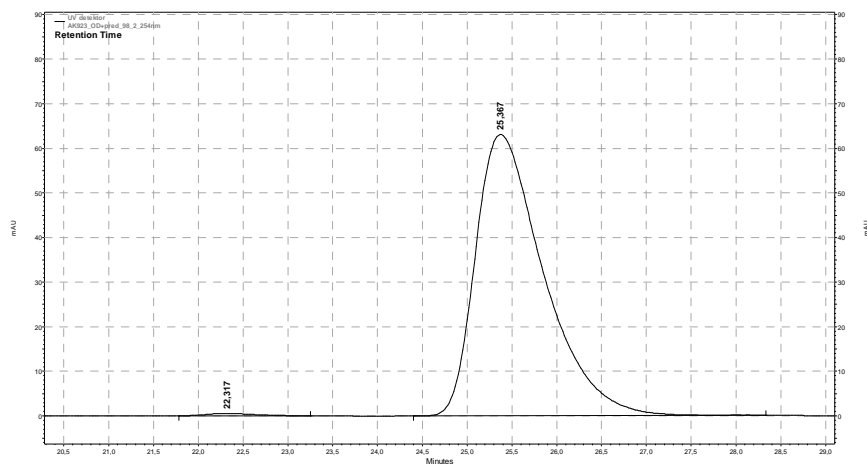

| Peak   | Retention [min] | Area    | Area % | Height | Height % |
|--------|-----------------|---------|--------|--------|----------|
| E1     | 22,317          | 20364   | 0,61   | 514    | 0,81     |
| E2     | 25,367          | 3329183 | 99,39  | 63074  | 99,19    |
| Totals |                 | 3349547 | 100    | 63588  | 100      |

Racemate:

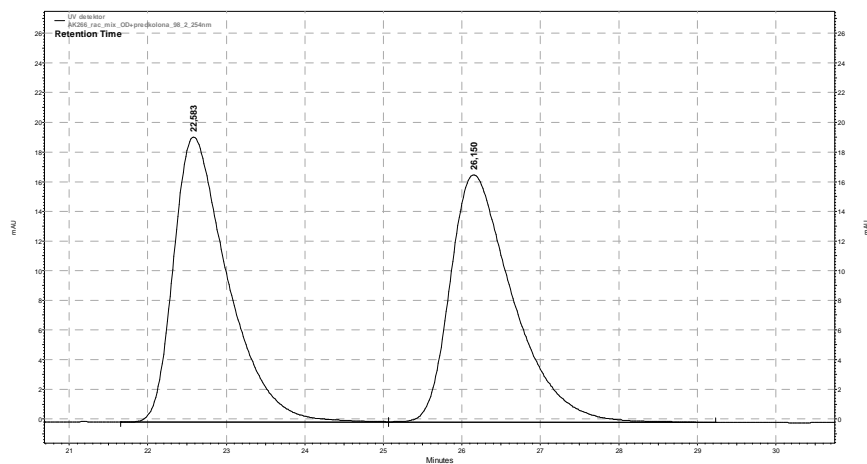

| Peak   | Retention [min] | Area    | Area % | Height | Height % |
|--------|-----------------|---------|--------|--------|----------|
| E1     | 22,583          | 922630  | 49,84  | 19218  | 53,52    |
| E2     | 26,15           | 928369  | 50,16  | 16689  | 46,48    |
| Totals |                 | 1850999 | 100    | 35907  | 100      |

**(R)-1-Tetralol.** Ee was determined by chiral GC analysis on Chiralsil-DEX CB column (25m×0.25mm), 130 °C (isothermal),  $t_R$ : 13.3 min (S), 13.8 min (R).<sup>6</sup>

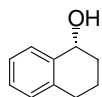

99.1% ee:

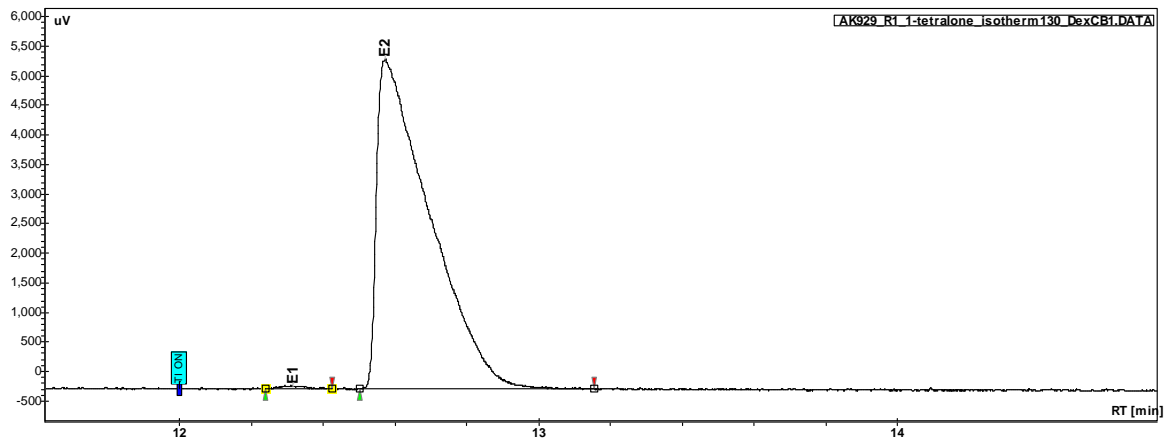

| Peak  | Name | Time [Min] | Height [uV] | Area [uV.Min] | Area % [%] |
|-------|------|------------|-------------|---------------|------------|
| 1     | E1   | 12.31      | 48.3        | 4.3           | 0.446      |
| 2     | E2   | 12.57      | 5579        | 953           | 99.554     |
| Total |      |            | 5627.3      | 957.2         | 100        |

Racemate:

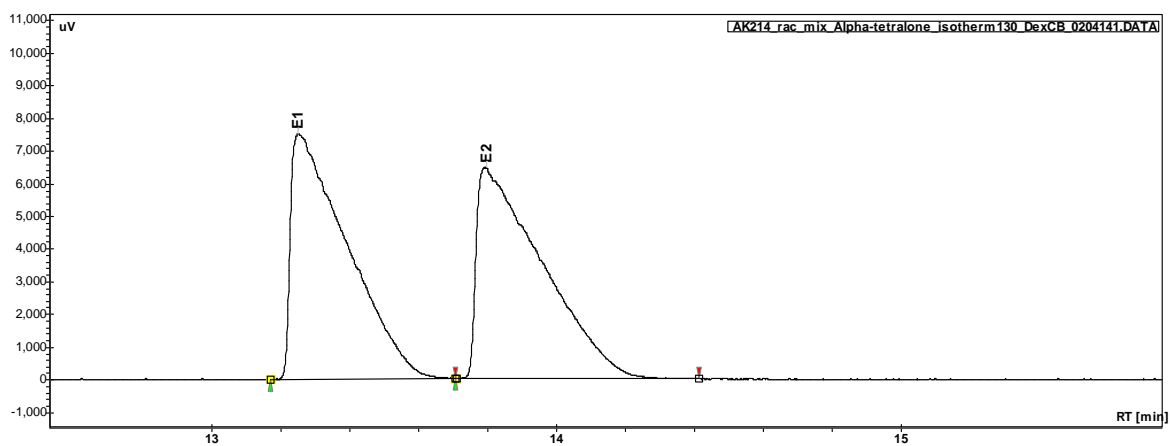

| Peak  | Name | Time [Min] | Height [uV] | Area [uV.Min] | Area % [%] |
|-------|------|------------|-------------|---------------|------------|
| 1     | E1   | 13.25      | 7499.5      | 1421.7        | 50.023     |
| 2     | E2   | 13.8       | 6458.2      | 1420.4        | 49.977     |
| Total |      |            | 13957.7     | 2842.2        | 100        |

**(R)-4-Chromanol.** Ee was determined by chiral HPLC analysis on Chiralcel OD-H column (25 cm). Eluent hexane/2-PrOH = 95/5, flow rate 1.0 mL/min,  $\lambda = 220$  nm,  $t_R$ : 10.0 min (S), 11.7 min (R).<sup>6</sup>

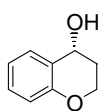

99.4% ee:

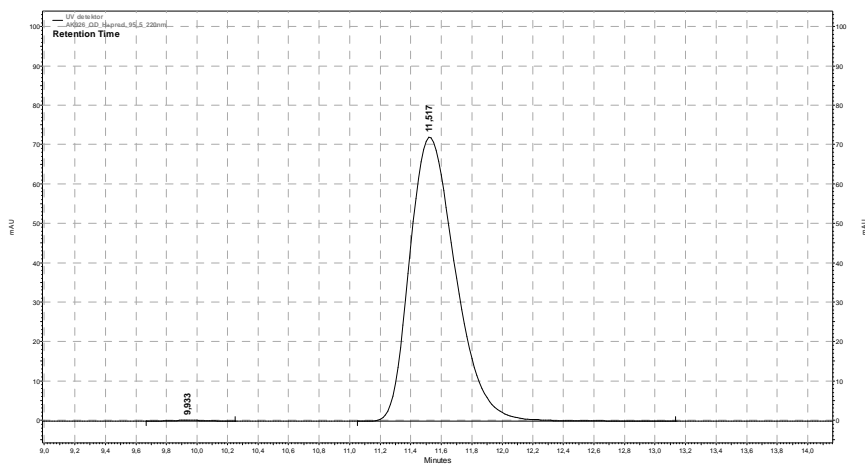

| Peak   | Retention [min] | Area    | Area % | Height | Height % |
|--------|-----------------|---------|--------|--------|----------|
| E1     | 9,933           | 3852    | 0,26   | 226    | 0,31     |
| E2     | 11,517          | 1503073 | 99,74  | 72088  | 99,69    |
| Totals |                 | 1506925 | 100    | 72314  | 100      |

Racemate:

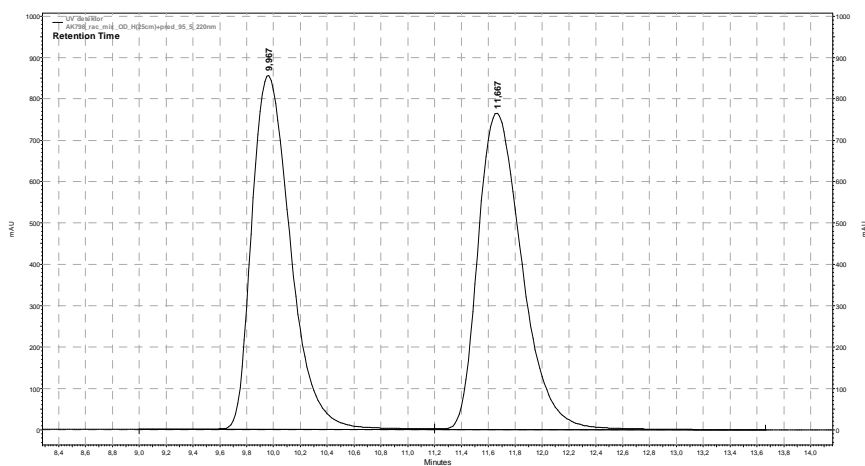

| Peak   | Retention [min] | Area     | Area % | Height  | Height % |
|--------|-----------------|----------|--------|---------|----------|
| E1     | 9,967           | 17102626 | 49,52  | 854922  | 52,79    |
| E2     | 11,667          | 17433312 | 50,48  | 764598  | 47,21    |
| Totals |                 | 34535938 | 100    | 1619520 | 100      |



**(1*R*,2*R*)-2-Methoxycarbonyl-1-indanol.** Ee was determined by chiral GC analysis on Chiralasil-DEX CB column (25m×0.25mm), 130 °C (isothermal); racemates (*cis/trans* = 55:45), *t<sub>R</sub>*: 33.7 min [*cis* (*R,R*)], 34.8 min [*cis* (*S,S*)], 45.0 min (*trans*-1), 50.0 min (*trans*-2).<sup>6</sup>

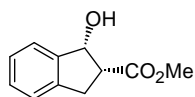

99.5% ee, *cis:trans*

97:3

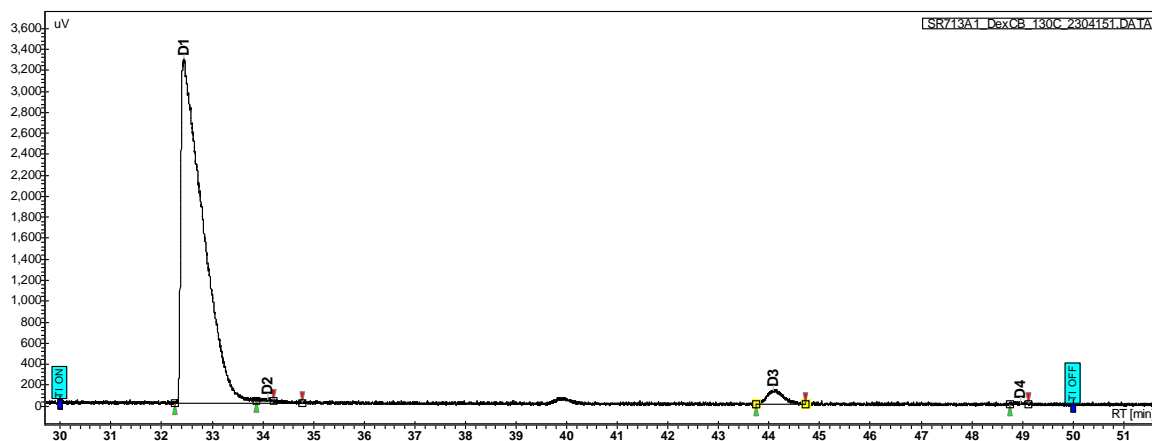

| Peak  | Name            | Time [Min] | Height [uV] | Area [uV.Min] | Area % [%] |
|-------|-----------------|------------|-------------|---------------|------------|
| 1     | ( <i>R,R</i> )  | 32.45      | 3277.9      | 1649.6        | 96.466     |
| 2     | ( <i>S,S</i> )  | 34.09      | 16.6        | 4.3           | 0.253      |
| 3     | <i>trans</i> -1 | 44.09      | 134.2       | 52.1          | 3.047      |
| 4     | <i>trans</i> -2 | 48.95      | 15.8        | 4             | 0.234      |
| Total |                 |            | 3444.6      | 1710          | 100        |

Racemates:

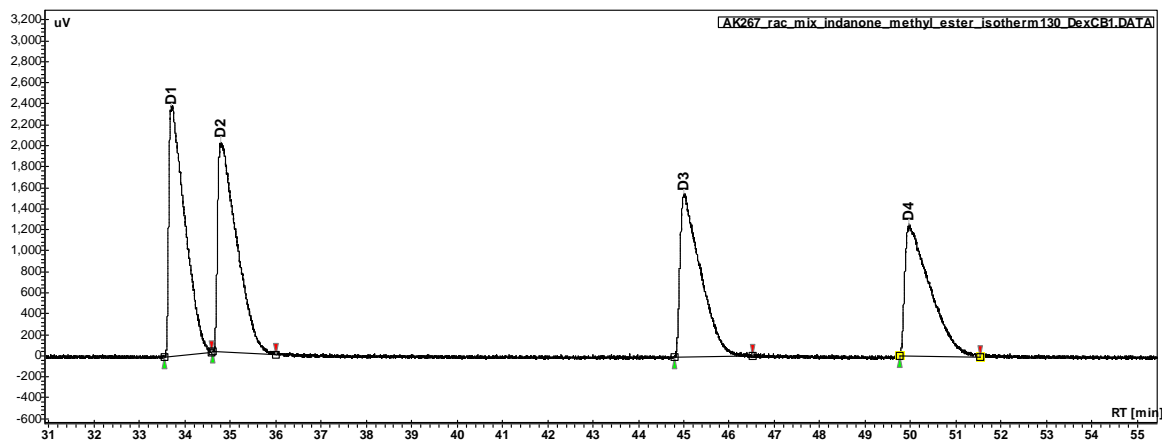

| Peak  | Name            | Time [Min] | Height [uV] | Area [uV.Min] | Area % [%] |
|-------|-----------------|------------|-------------|---------------|------------|
| 1     | ( <i>R,R</i> )  | 33.71      | 2385.5      | 977.2         | 27.468     |
| 2     | ( <i>S,S</i> )  | 34.79      | 1991        | 972           | 27.323     |
| 3     | <i>trans</i> -1 | 45         | 1550.7      | 807.9         | 22.71      |
| 4     | <i>trans</i> -2 | 49.96      | 1253.2      | 800.4         | 22.499     |
| Total |                 |            | 7180.4      | 3557.6        | 100        |

**(1*R*,3*S*)-3-Methoxycarbonyl-1-indanol.** Ee was determined by chiral GC analysis on Chiralsil-DEX CB column (25m×0.25mm), 130 °C (isothermal); racemates (*cis/trans* = 97:3), *t<sub>R</sub>*: 16.8 min [*cis* (1*S*,3*R*)], 18.6 min [*cis* (1*R*,3*S*)], 24.1 min (*trans*-1), 25.2 min (*trans*-2).

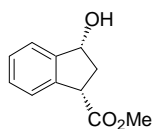

98.8% ee (*cis*), >99% ee (*trans*):

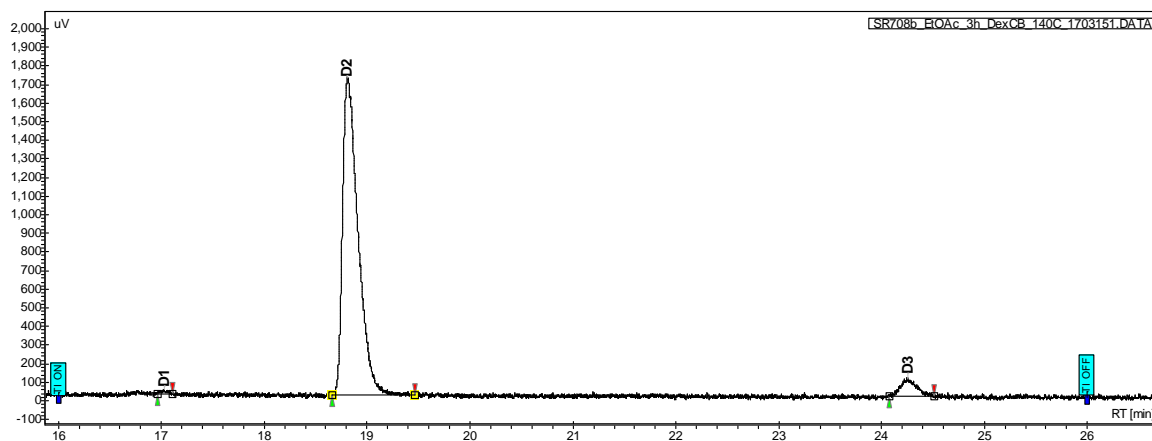

| Peak  | Name  | Time [Min] | Height [uV] | Area [uV.Min] | Area % [%] |
|-------|-------|------------|-------------|---------------|------------|
| 1     | (S,R) | 17.03      | 24          | 1.8           | 0.566      |
| 2     | (R,S) | 18.81      | 1704.4      | 299.5         | 94.123     |
| 3     | trans | 24.25      | 95.9        | 16.9          | 5.311      |
| Total |       |            | 1824.3      | 318.2         | 100        |

Racemates:

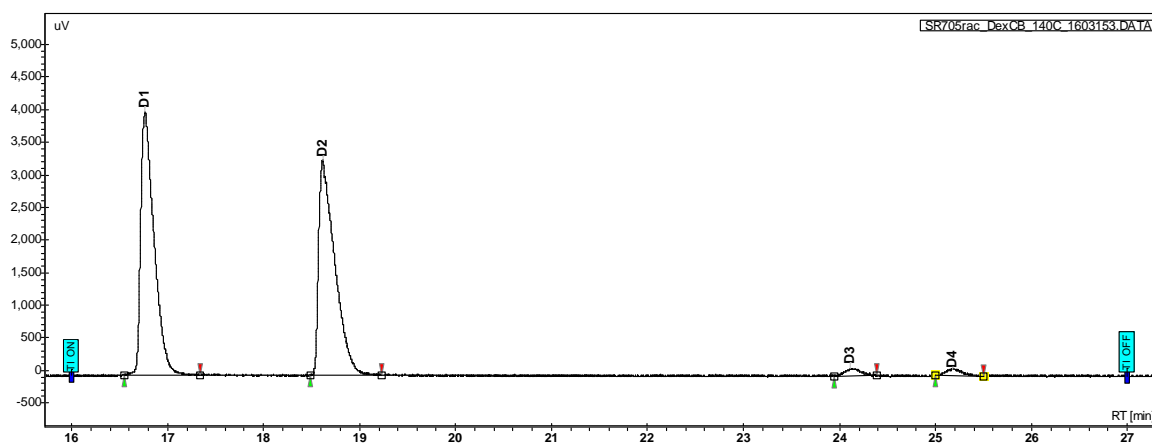

| Peak  | Name    | Time [Min] | Height [uV] | Area [uV.Min] | Area [%] |
|-------|---------|------------|-------------|---------------|----------|
| 1     | (S,R)   | 16.76      | 4029.6      | 648           | 48.569   |
| 2     | (R,S)   | 18.62      | 3304.1      | 641.9         | 48.109   |
| 3     | trans-1 | 24.11      | 114.1       | 22.7          | 1.699    |
| 4     | trans-2 | 25.18      | 104.7       | 21.7          | 1.623    |
| Total |         |            | 7552.5      | 1334.2        | 100      |

**(1*R*,2*R*)-2-Methoxycarbonyl-1-tetralol.** Dr (*cis/trans* = 97.6:2.4) was determined by <sup>1</sup>H NMR; ee (*cis* 99.4%) was determined by chiral HPLC analysis on Chiralpak IB-3 column (25 cm). Eluent hexane/2-PrOH = 97/3, flow rate 1.0 mL/min, λ = 220 nm; racemates: *t<sub>R</sub>*: 15.4 min (*trans*-1), 17.4 min [*cis* (*R,R*)], 19.7 min (*trans*-2), 32.7 min [*cis* (*S,S*)].

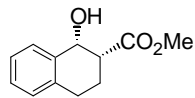

*cis/trans* = 98:2, >99% ee (*cis*)

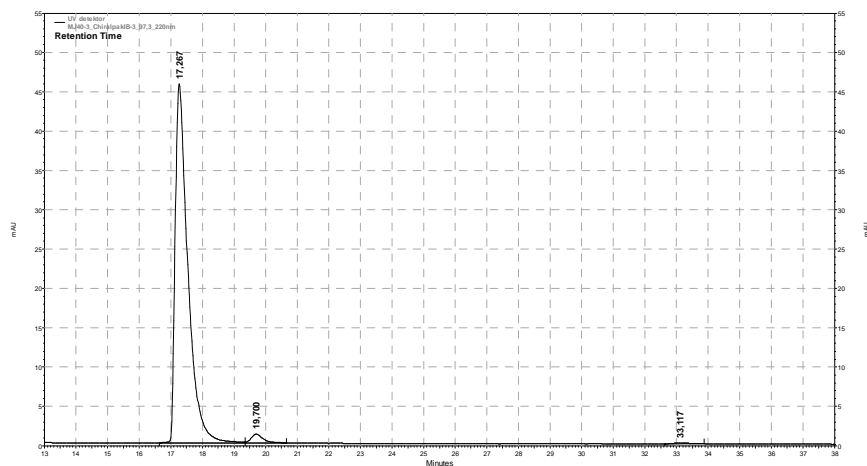

| Retention Time | Area    | Area % | Height | Height % |
|----------------|---------|--------|--------|----------|
| 17,267         | 1273876 | 97,49  | 45633  | 97,35    |
| 19,700         | 28950   | 2,22   | 1120   | 2,39     |
| 33,117         | 3868    | 0,30   | 124    | 0,26     |
| Totals         | 1306694 | 100,00 | 46877  | 100,00   |

Mixture prepared by weighing both corresponding ATH products derived from enantiomeric catalysts:

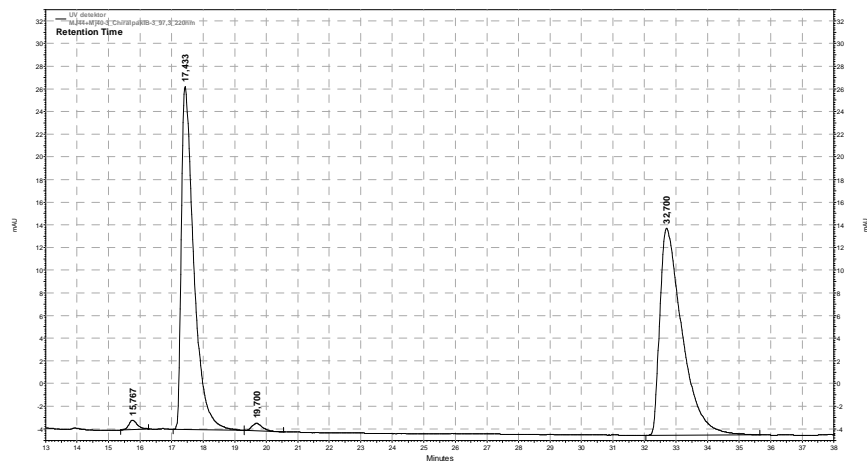

| Retention Time | Area    | Area % | Height | Height % |
|----------------|---------|--------|--------|----------|
| 15,767         | 15468   | 0,88   | 820    | 1,64     |
| 17,433         | 836859  | 47,35  | 30256  | 60,51    |
| 19,700         | 15787   | 0,89   | 662    | 1,32     |
| 32,700         | 899355  | 50,88  | 18265  | 36,53    |
| Totals         | 1767469 | 100,00 | 50003  | 100,00   |

**(1*R*,3*RS*)-3-Methoxycarbonyl-1-tetralol.** Dr (*cis/trans* = 50:50) was determined by  $^1\text{H}$  NMR; ee (99% for *cis*) was determined by  $^{19}\text{F}$  NMR ( $\text{CDCl}_3$ ) of the (*R*)-Mosher ester (prepared from (*S*)-Mosher's acid chloride):  $\delta$  71.95 [*cis* (1*R*,3*R*)], 72.00 [*cis* (1*S*,3*S*)], 72.24 (*trans*; stereoisomers not separated).

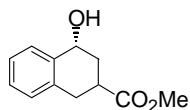

*cis/trans* = 50:50, 99% ee (*cis*)

$^{19}\text{F}$  NMR ( $\text{CDCl}_3$ ) of the (*R*)-Mosher ester

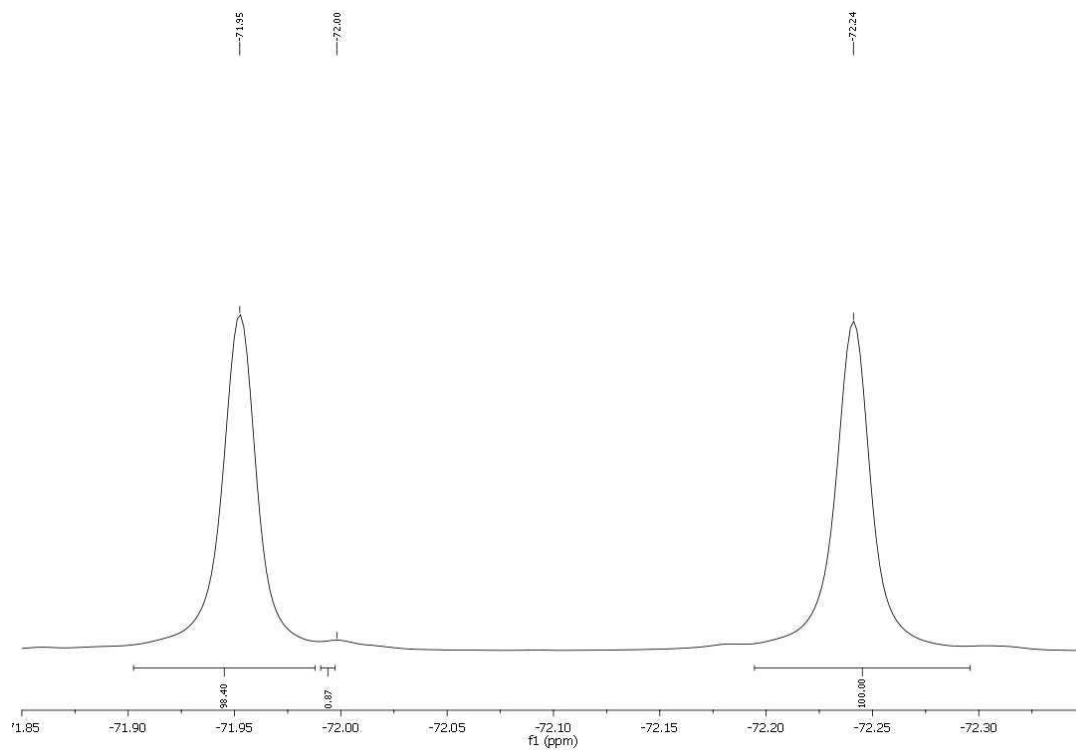

Racemates:

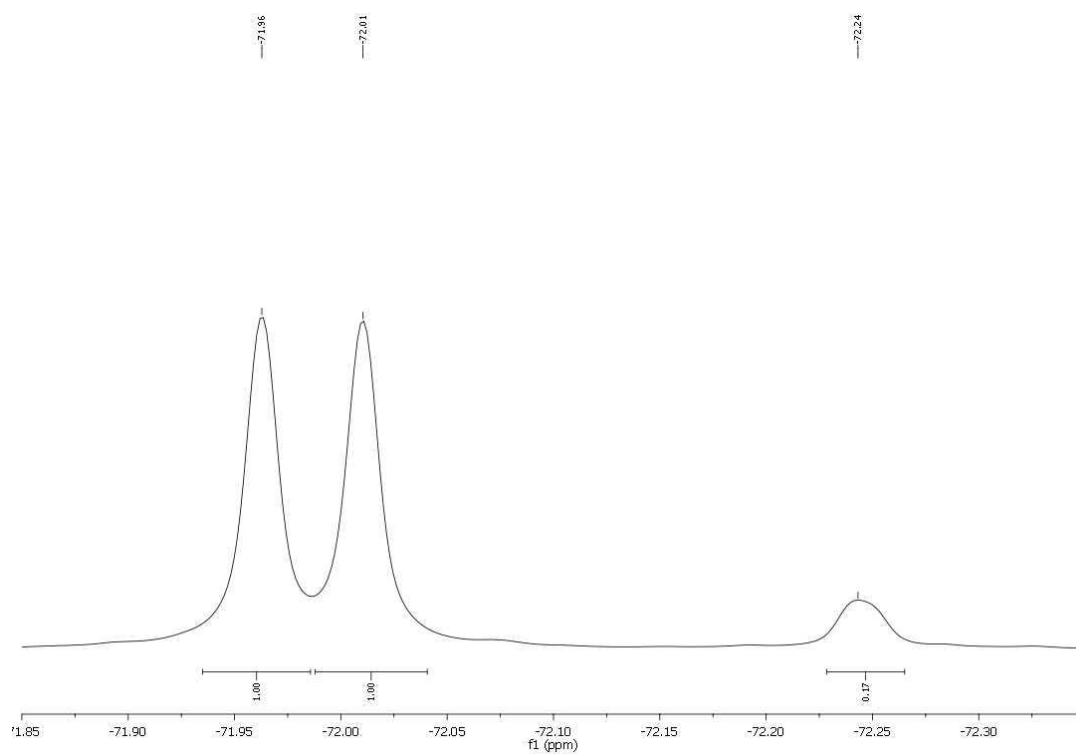

**(1*R*,4*R*S)-4-Methoxycarbonyl-1-tetralol.** Dr (*cis/trans* = 50:50) was determined by <sup>1</sup>H NMR; ee was determined by chiral GC analysis on Chiralsil-DEX CB column (25m×0.25mm), 150 °C (isothermal); racemates (*cis/trans* = 72:28), *t<sub>R</sub>*: 21.1 min (*cis* 1*R*,4*S*), 21.9 min (*trans* 1*R*,4*R*), 22.7 min (*cis* 1*S*,4*R*), 24.4 min (*trans* 1*S*,4*S*).

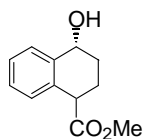

>99% ee (*cis*), >99% ee (*trans*):

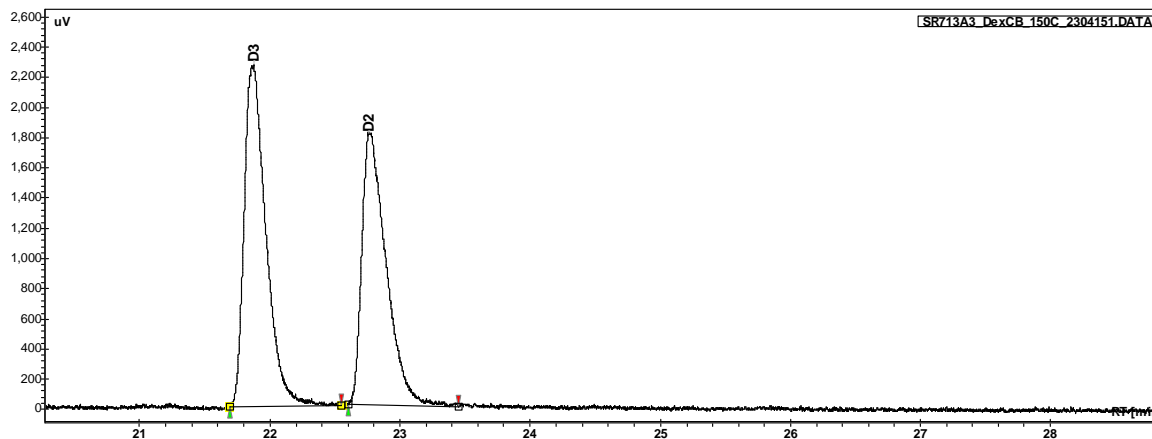

| Peak  | Name | Time [Min] | Height [uV] | Area [uV.Min] | Area % [%] |
|-------|------|------------|-------------|---------------|------------|
| 1     | D3   | 21.88      | 2268.4      | 438.8         | 52.845     |
| 2     | D2   | 22.76      | 1803.8      | 391.6         | 47.155     |
| Total |      |            | 4072.2      | 830.4         | 100        |

Racemates (*cis/trans* 72:28):

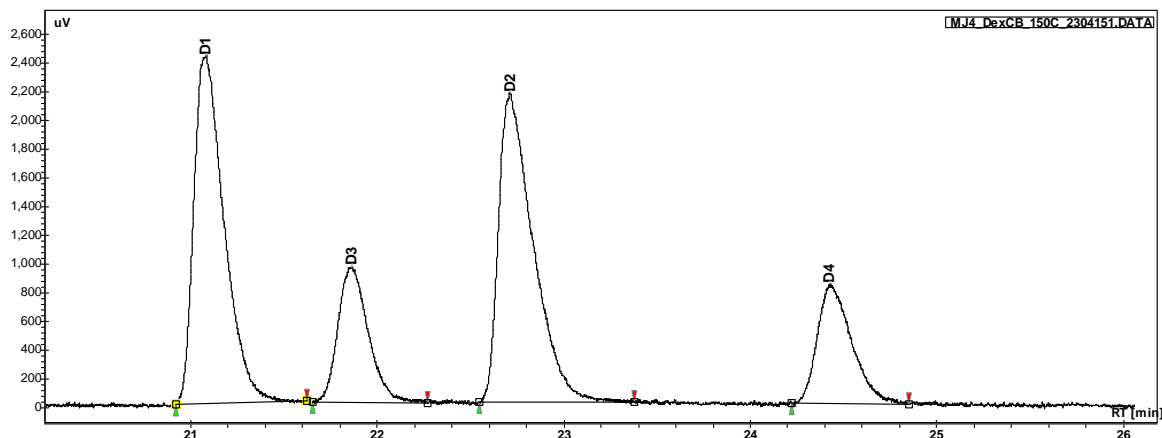

| Peak  | Name | Time [Min] | Height [uV] | Area [uV.Min] | Area % [%] |
|-------|------|------------|-------------|---------------|------------|
| 1     | D1   | 21.08      | 2418.5      | 453.4         | 35.934     |
| 3     | D3   | 21.86      | 942.9       | 178.2         | 14.126     |
| 2     | D2   | 22.71      | 2150        | 453.5         | 35.939     |
| 4     | D4   | 24.43      | 833.6       | 176.7         | 14.001     |
| Total |      |            | 6345        | 1261.8        | 100        |

### 3. $^1\text{H}$ NMR and $^{13}\text{C}$ NMR spectra

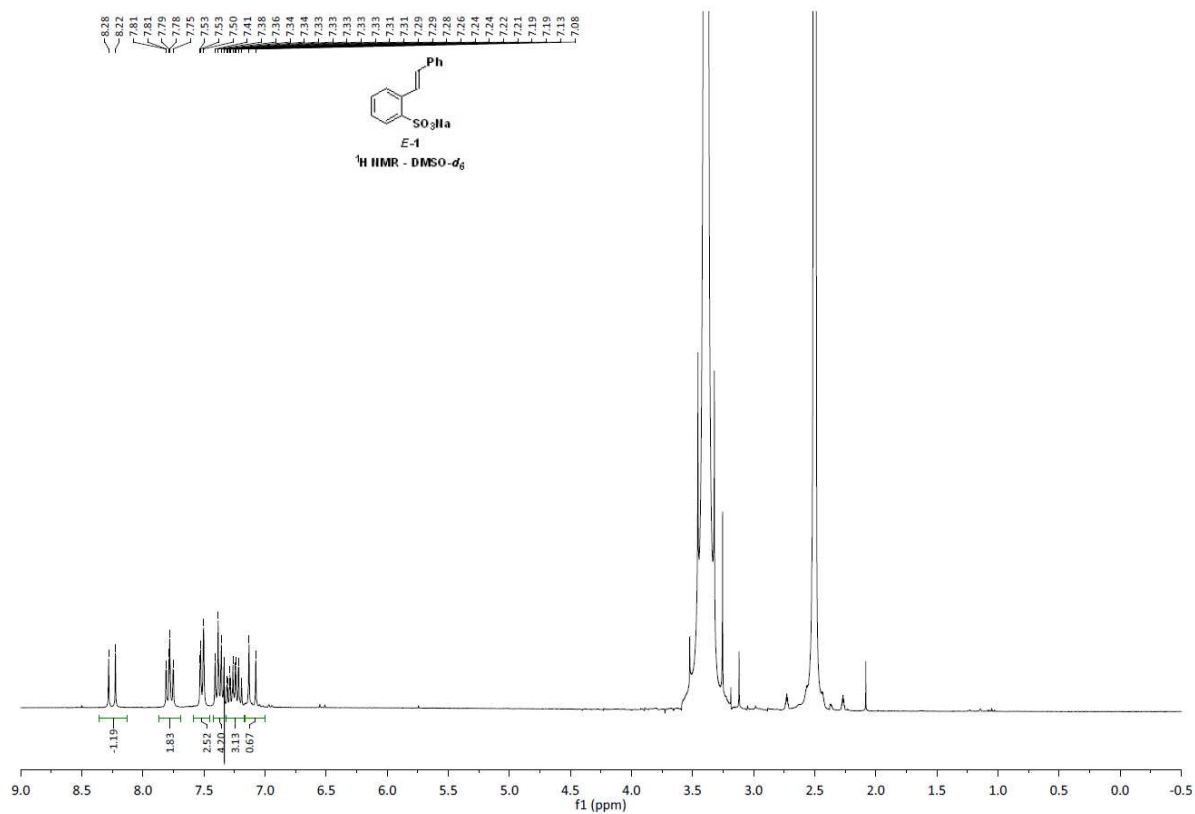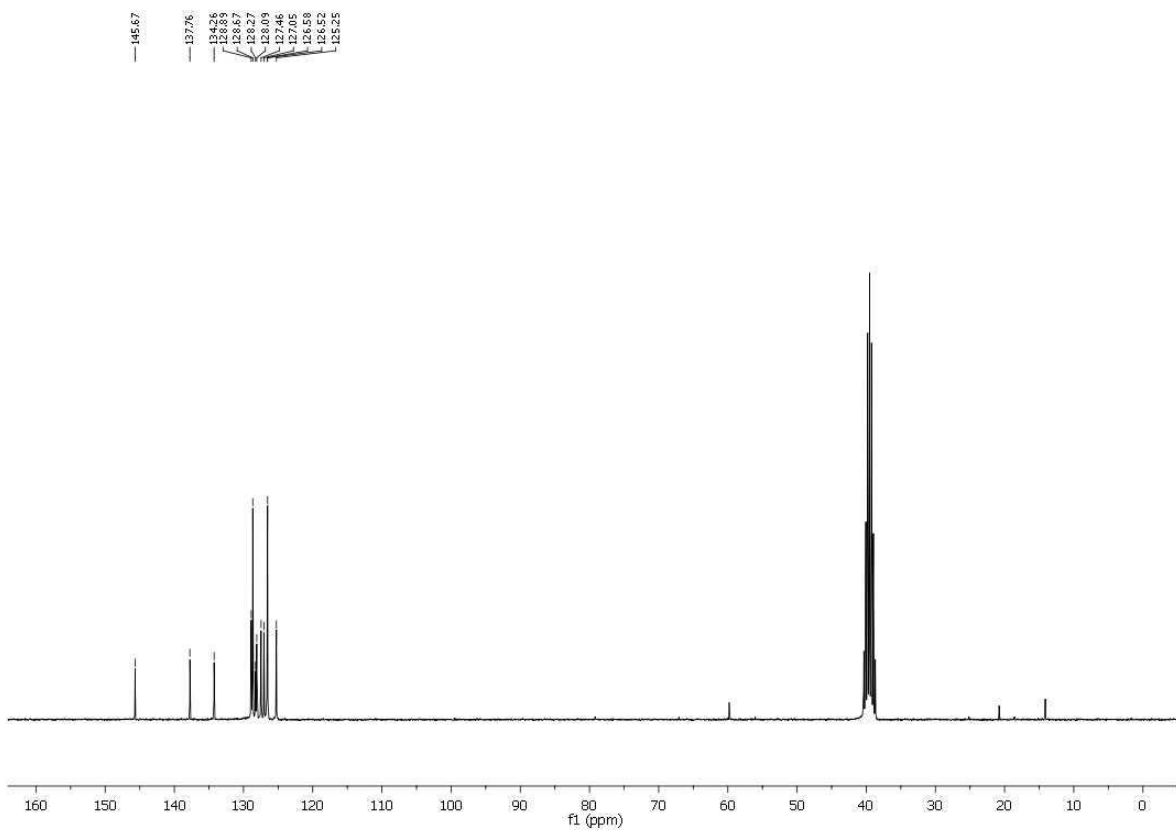

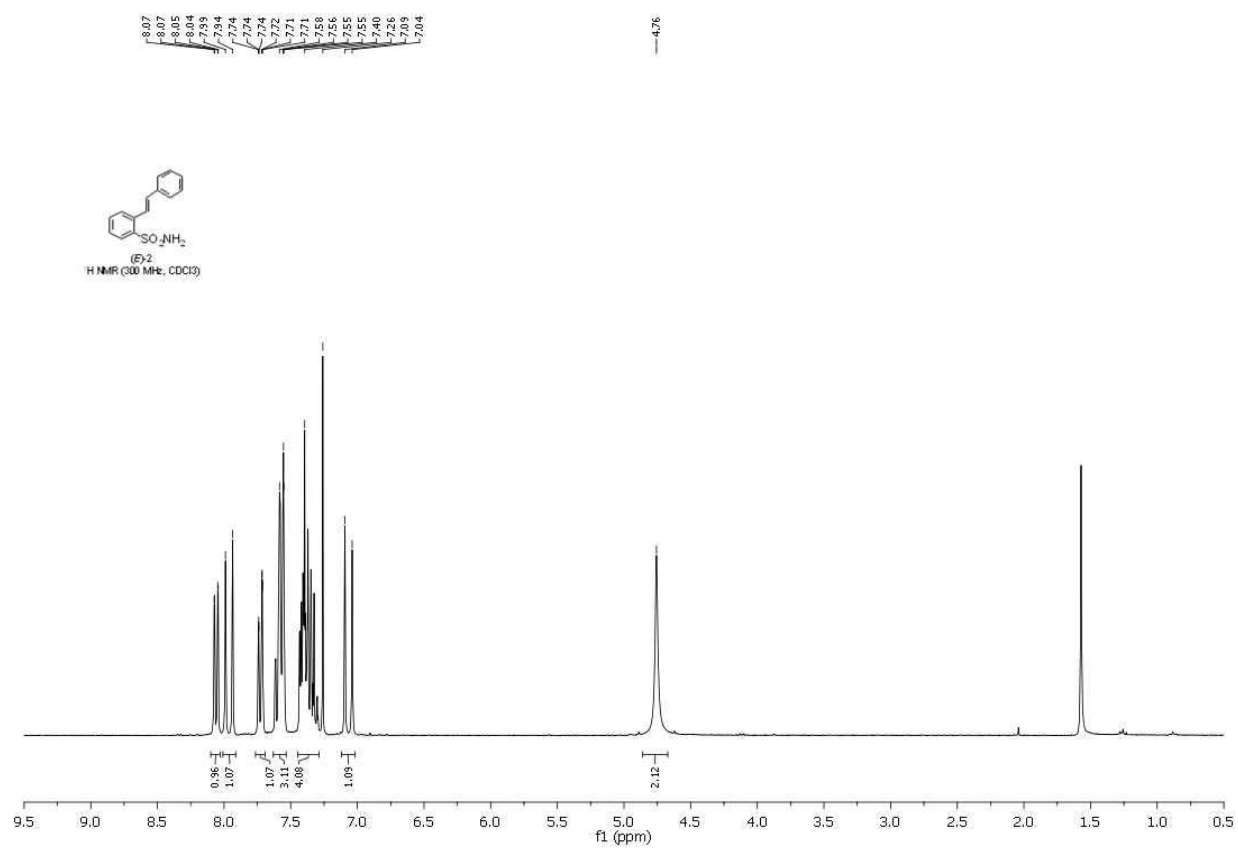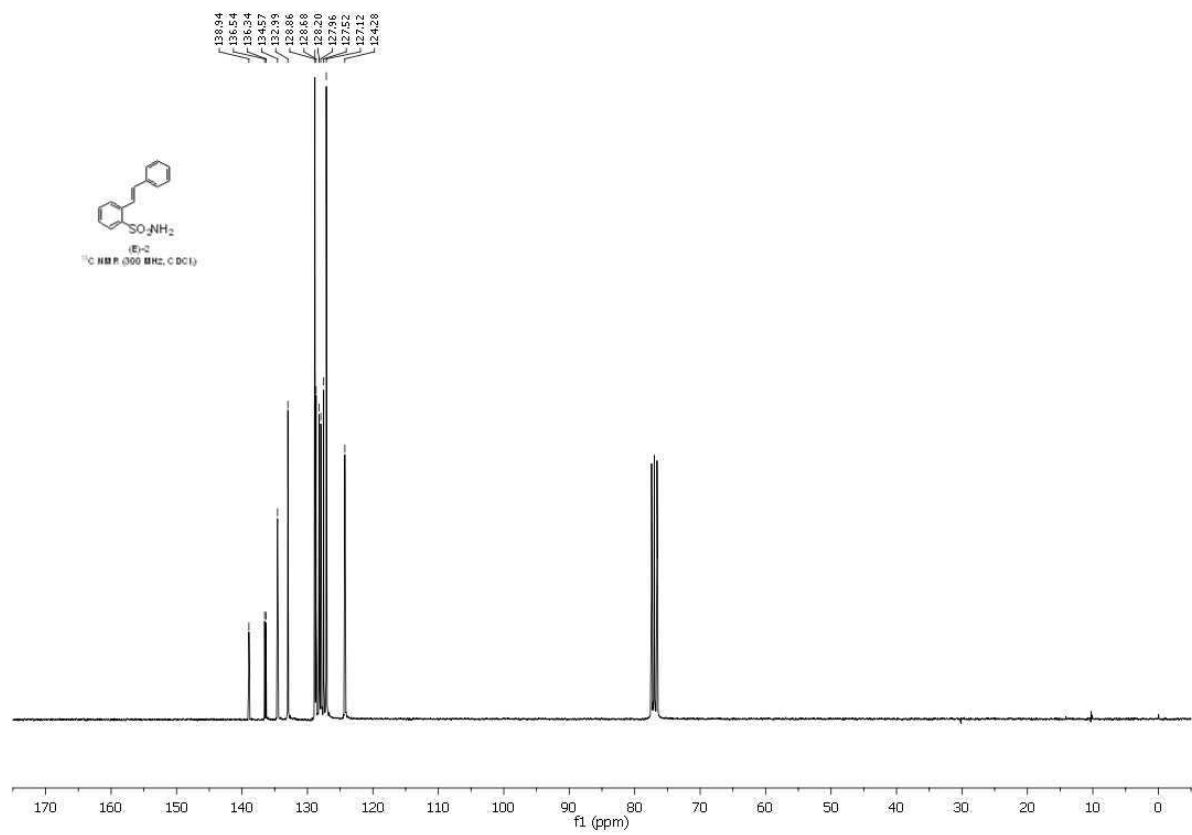

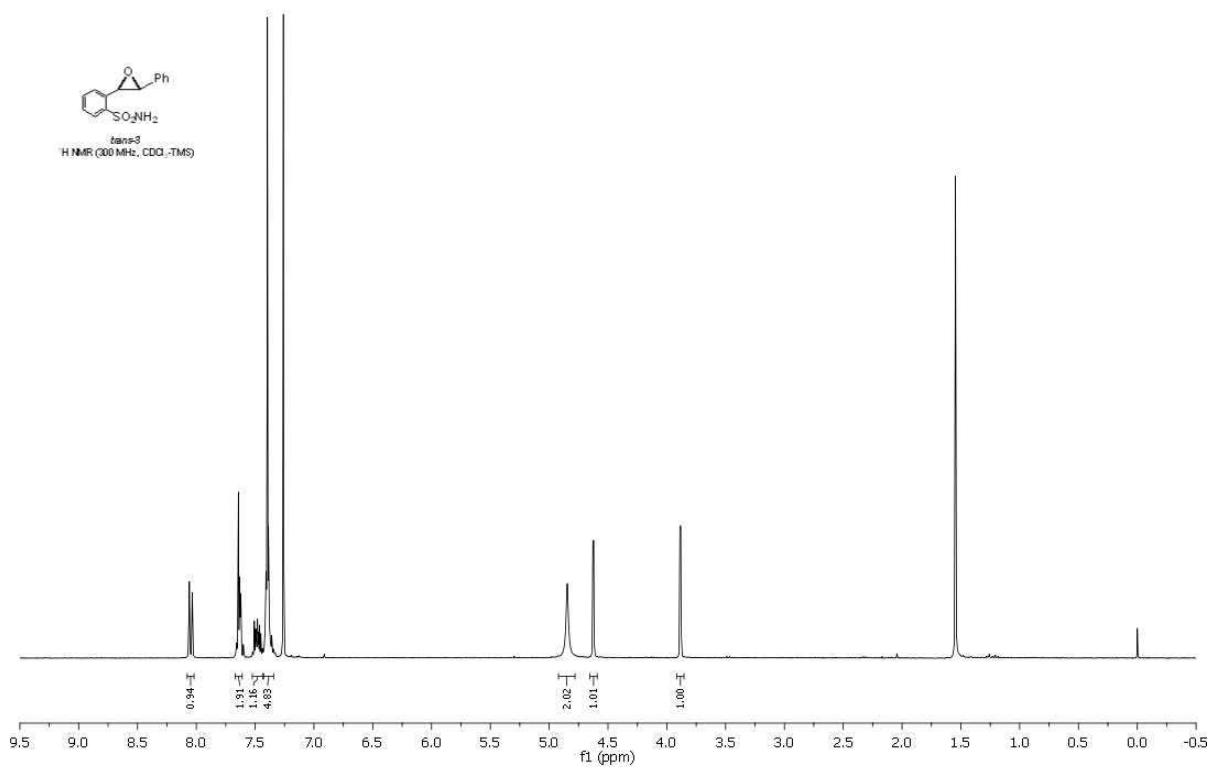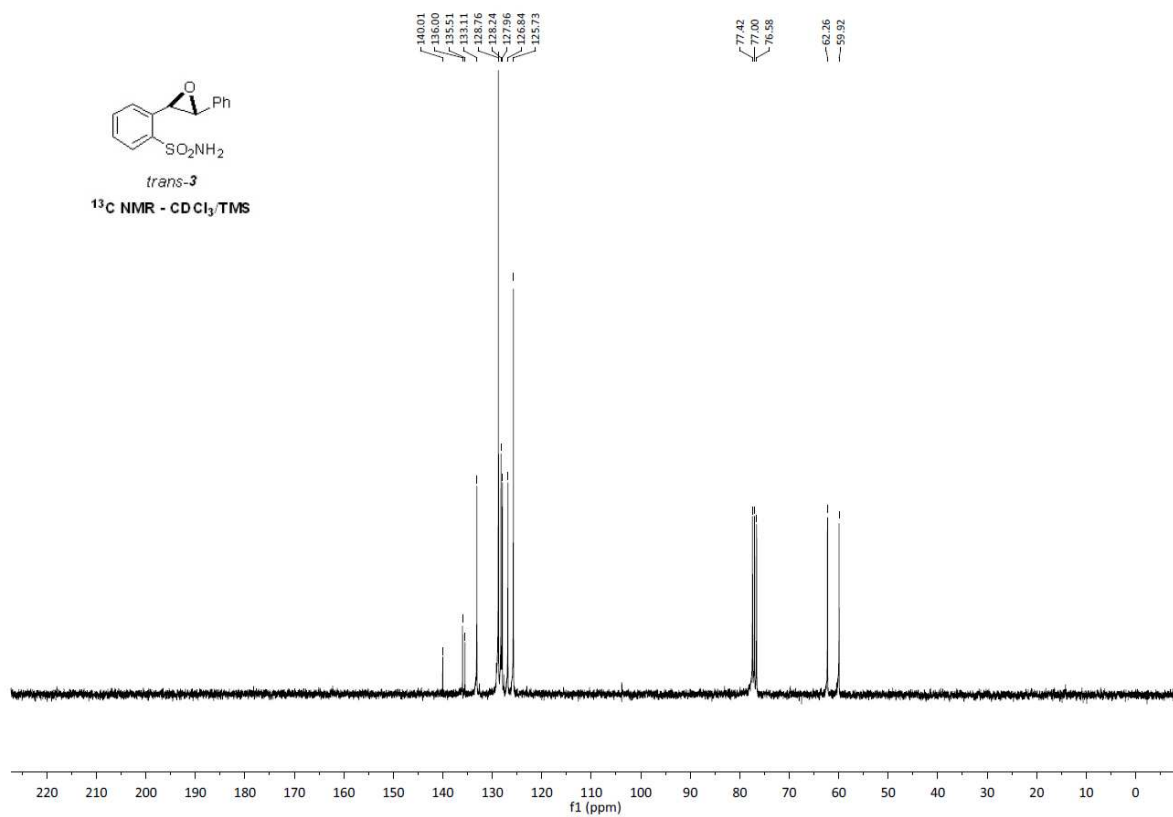



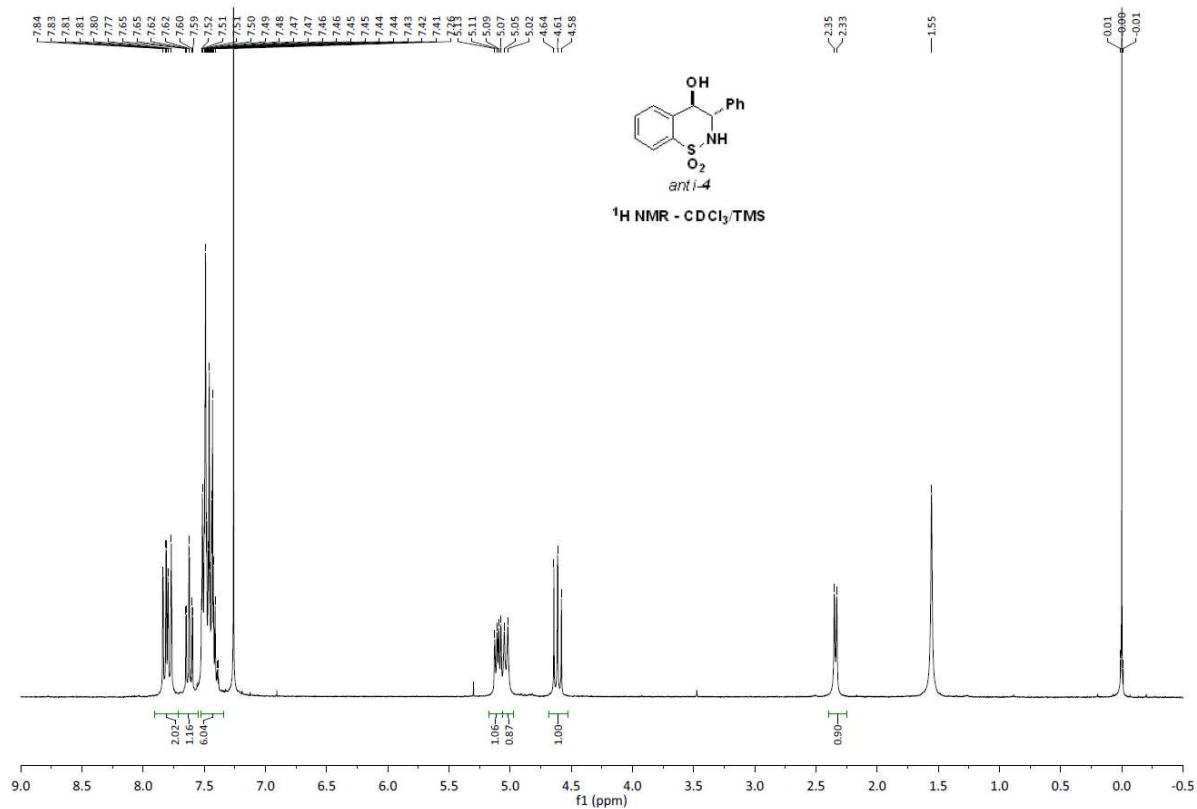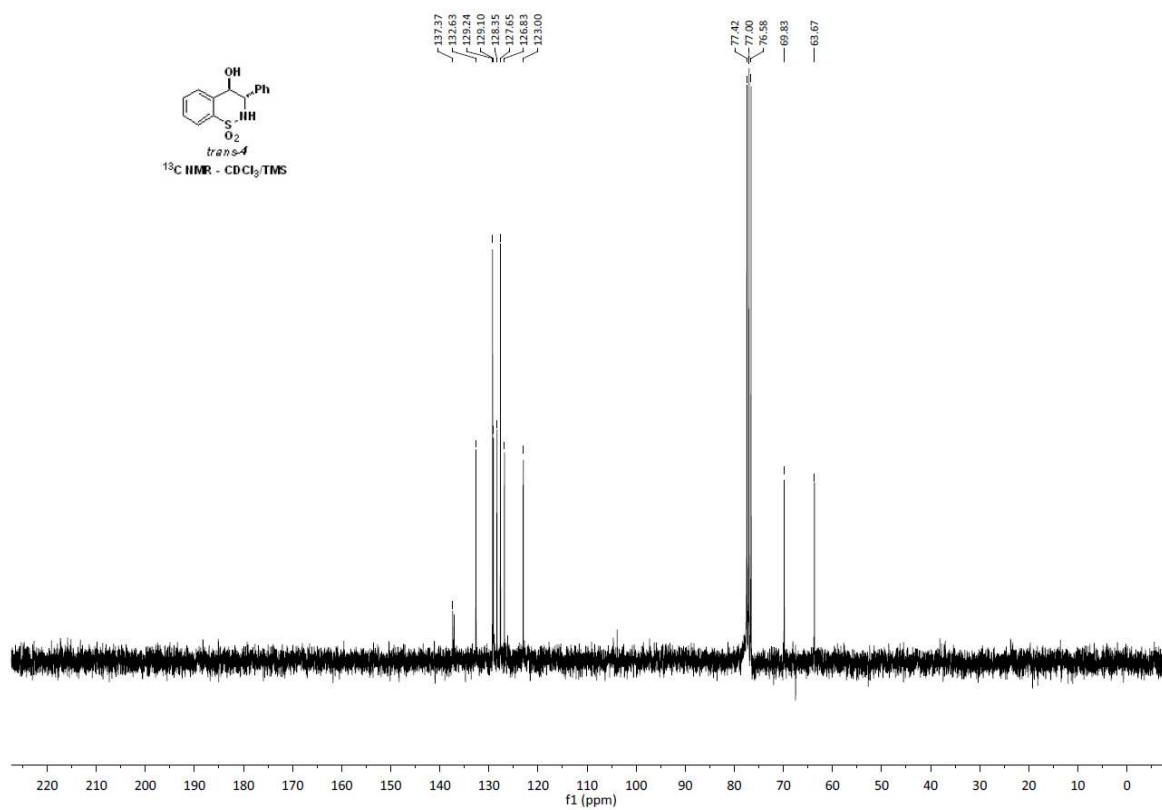

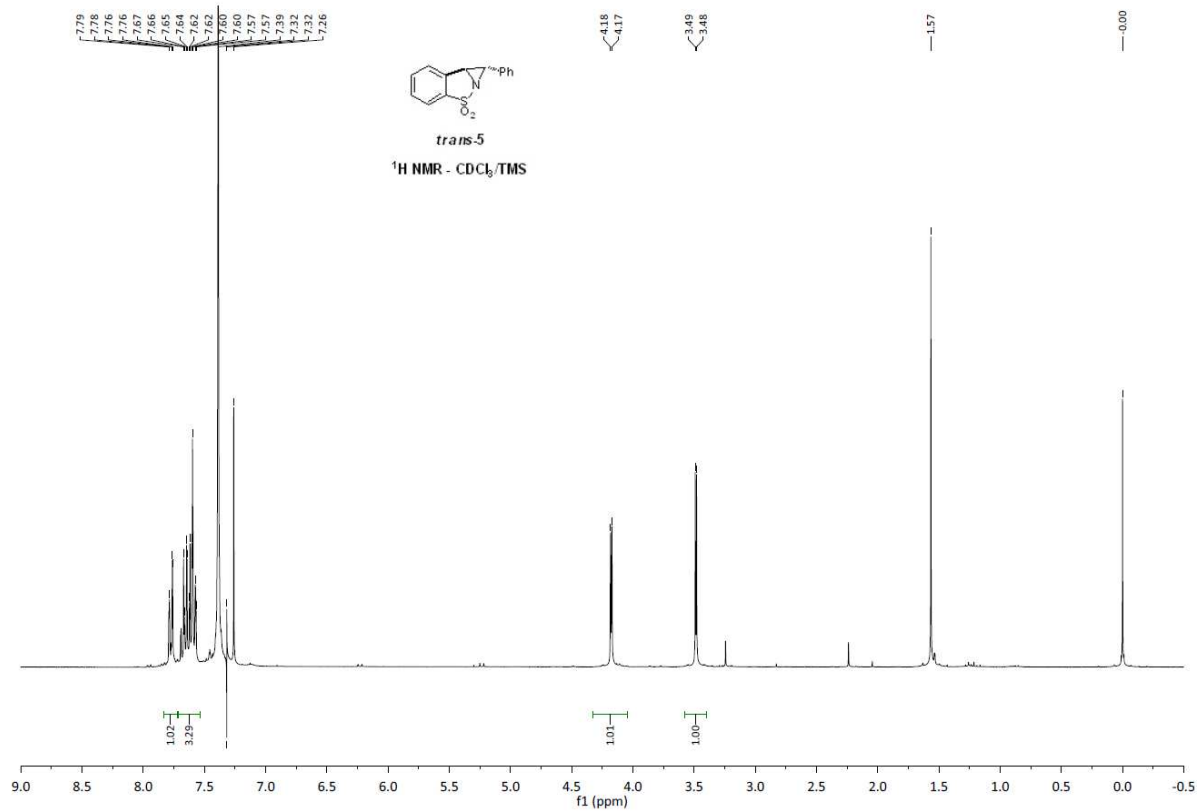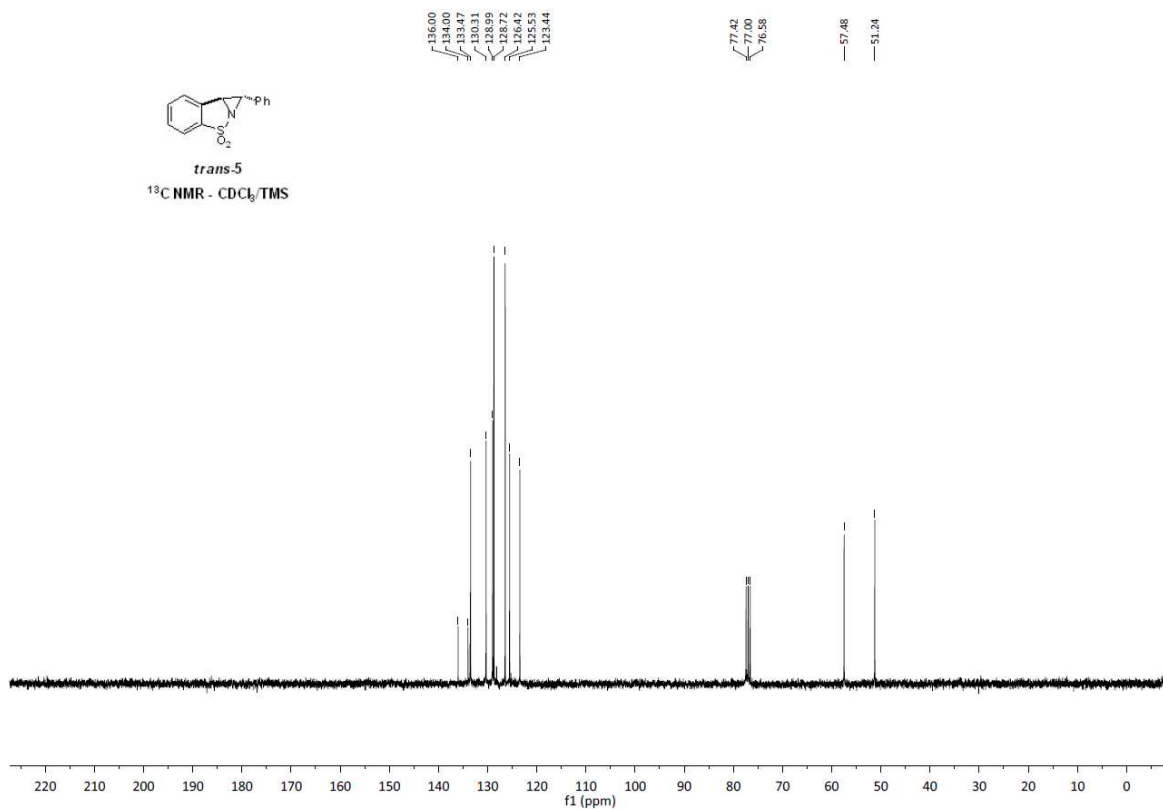

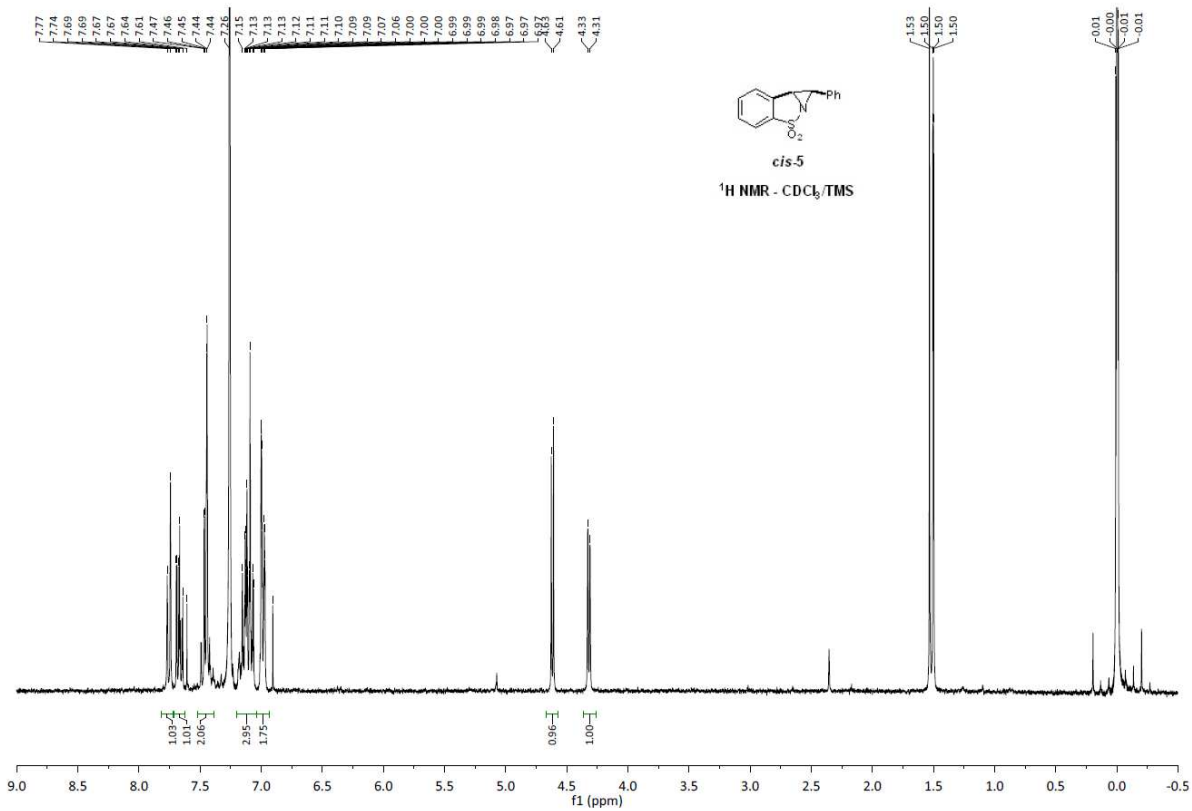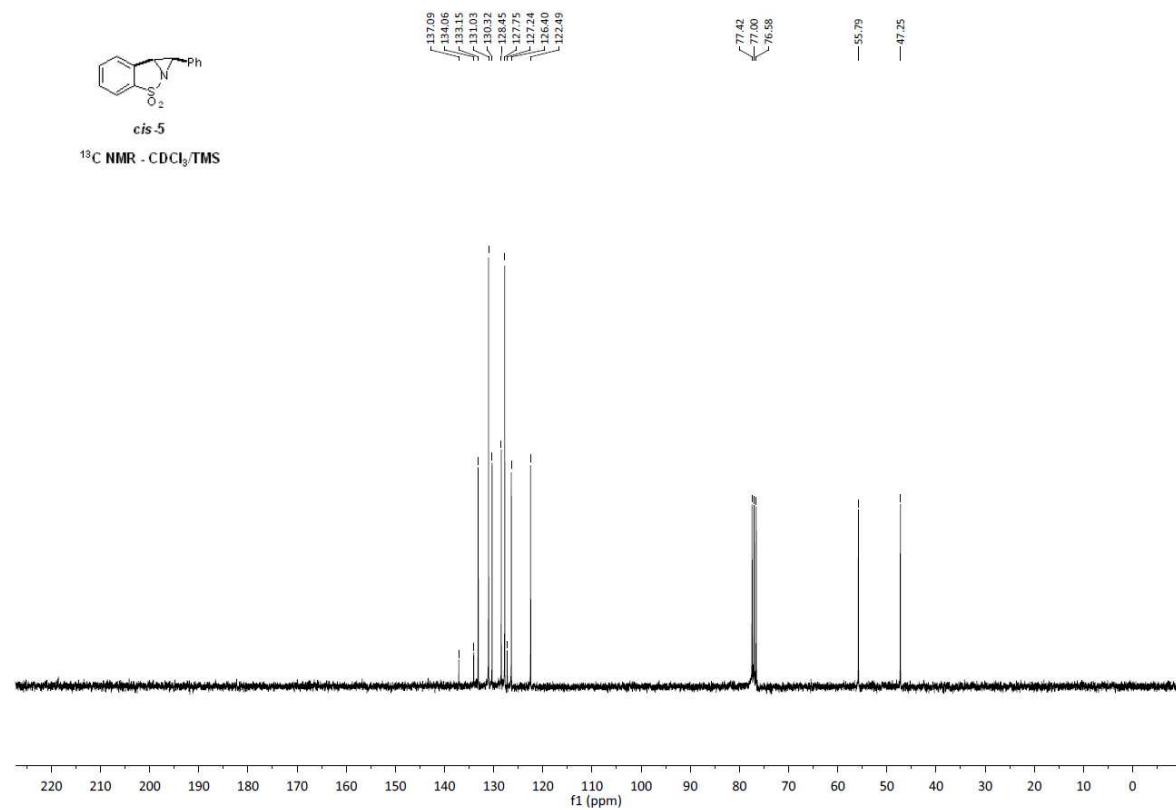

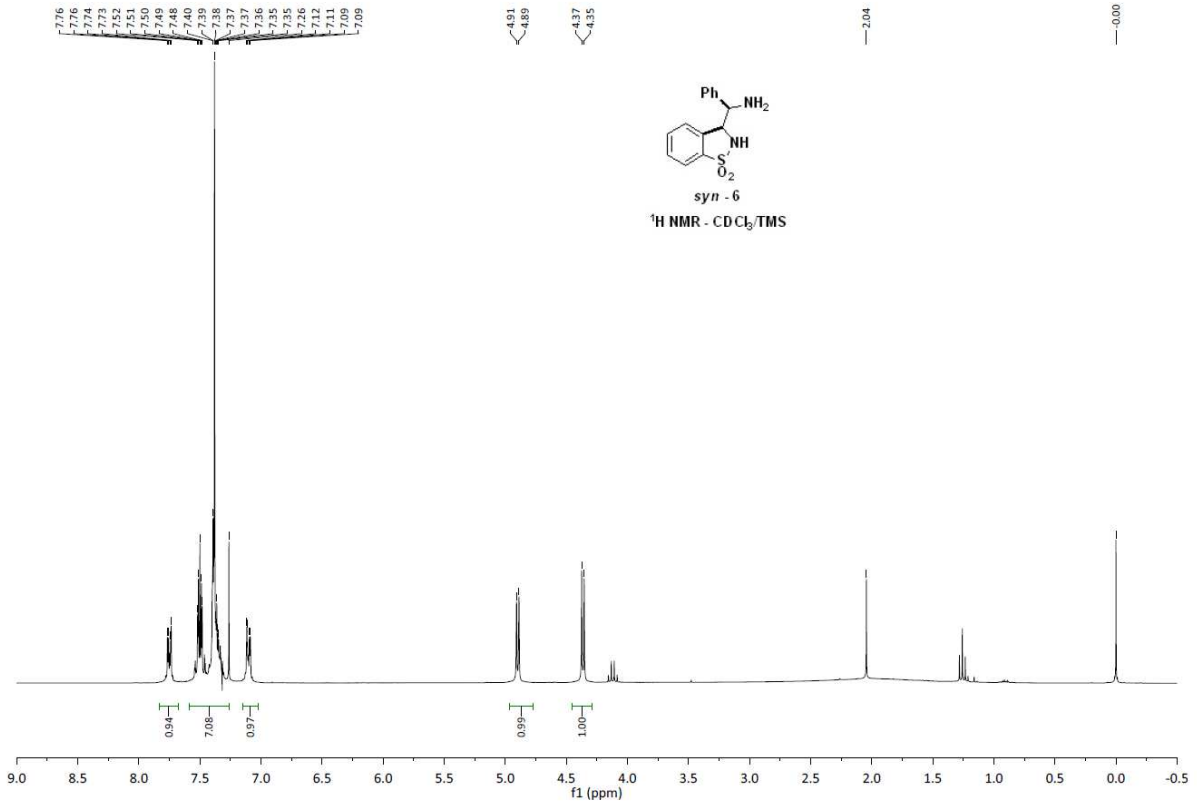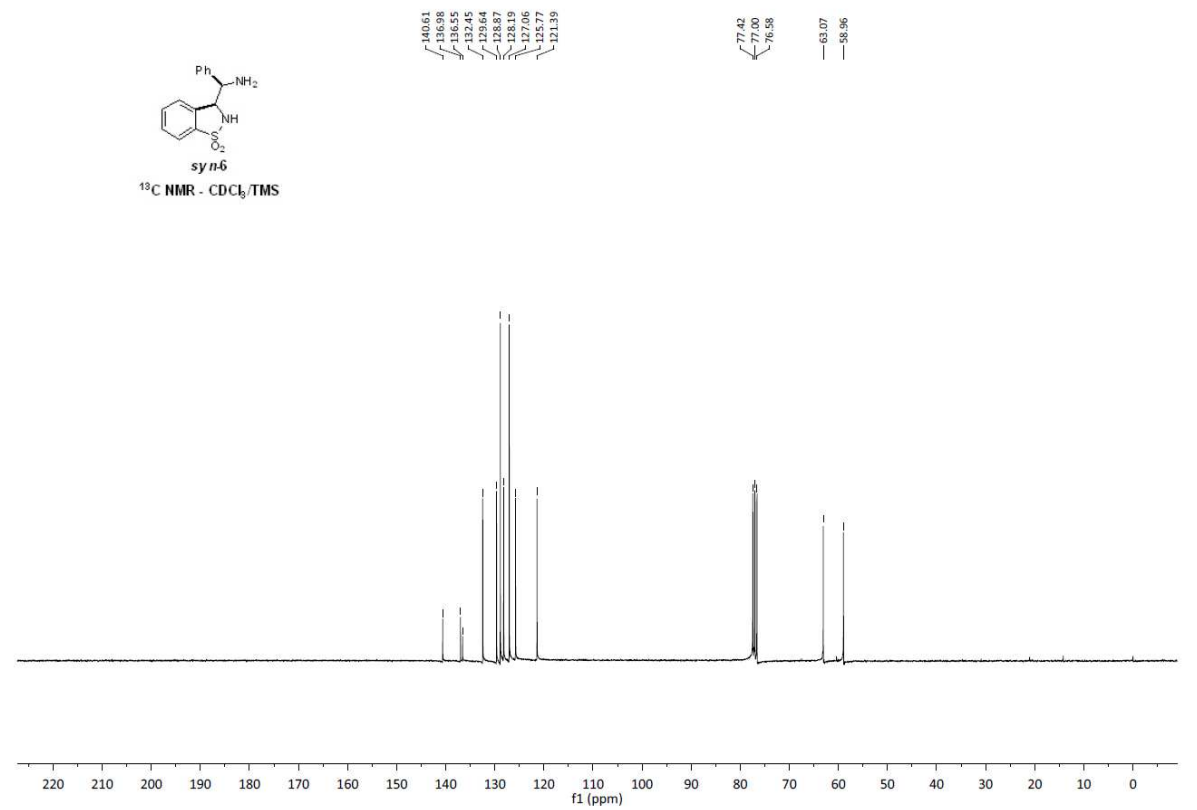

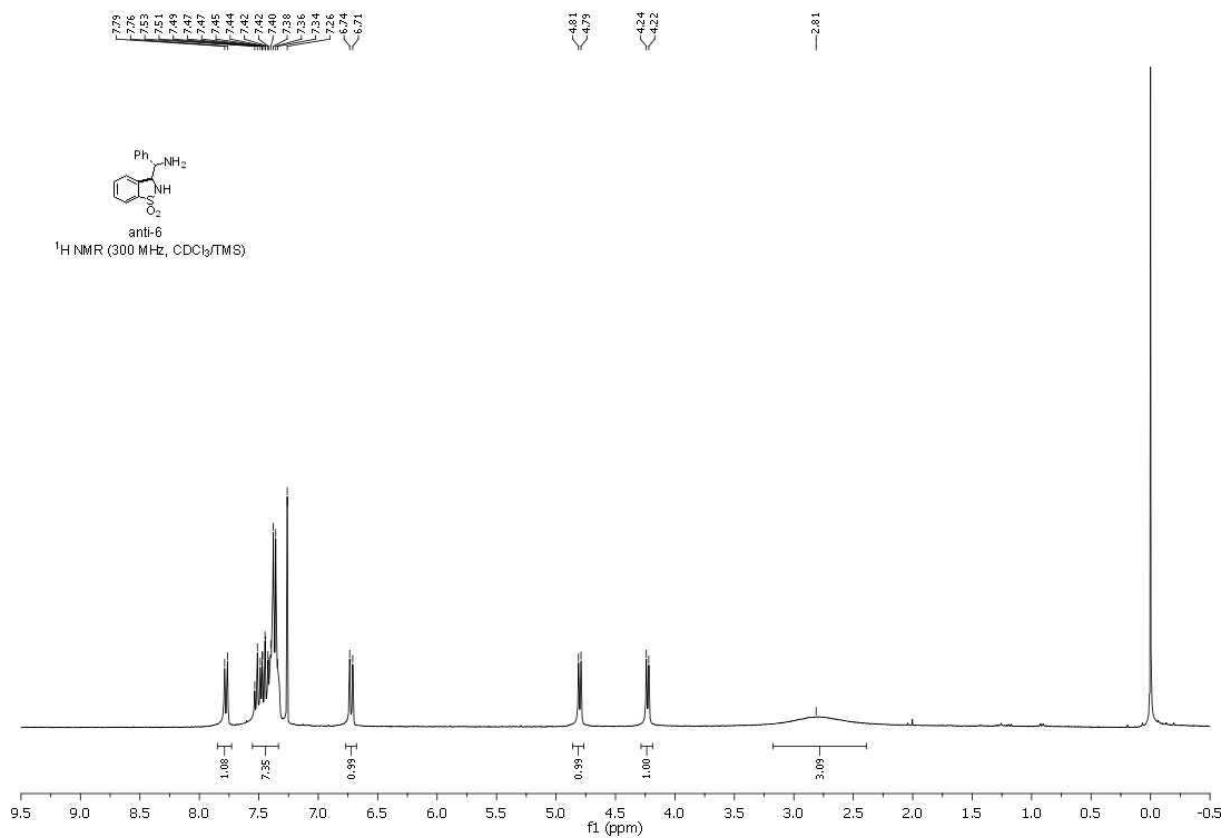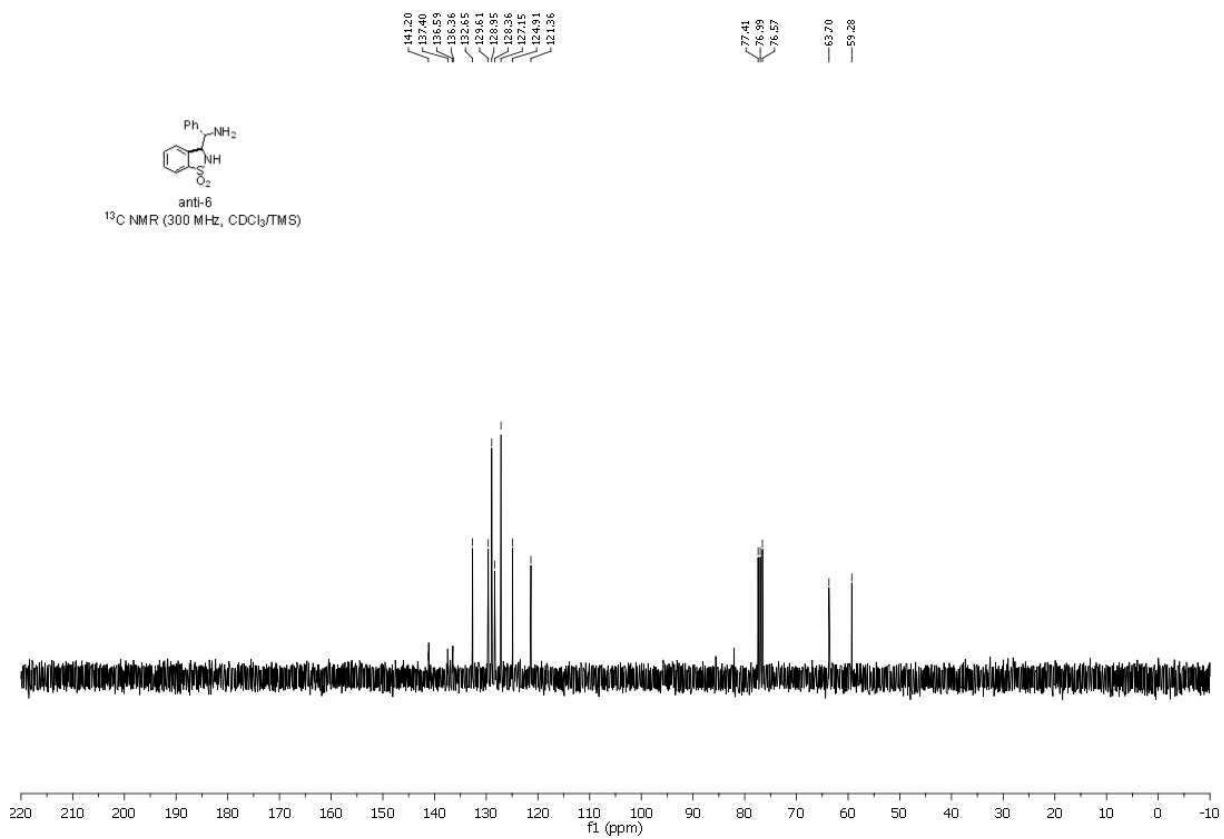

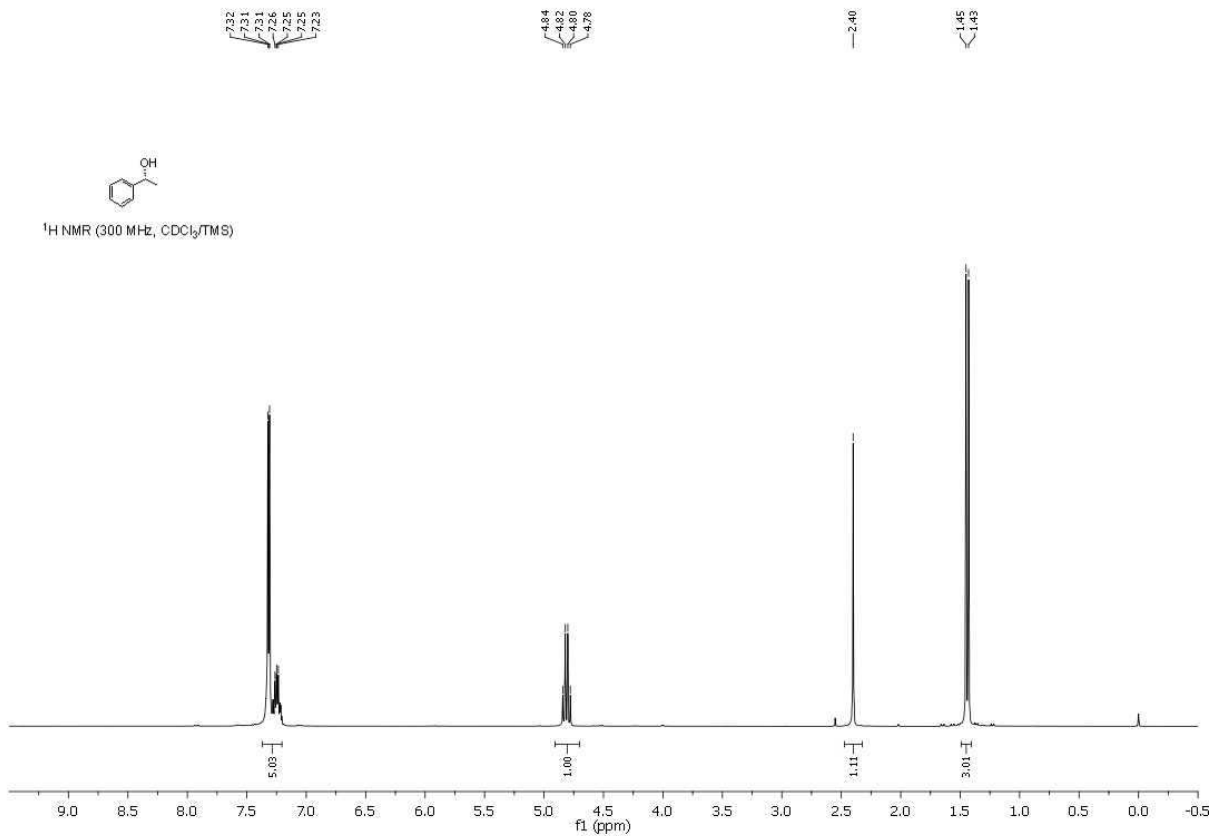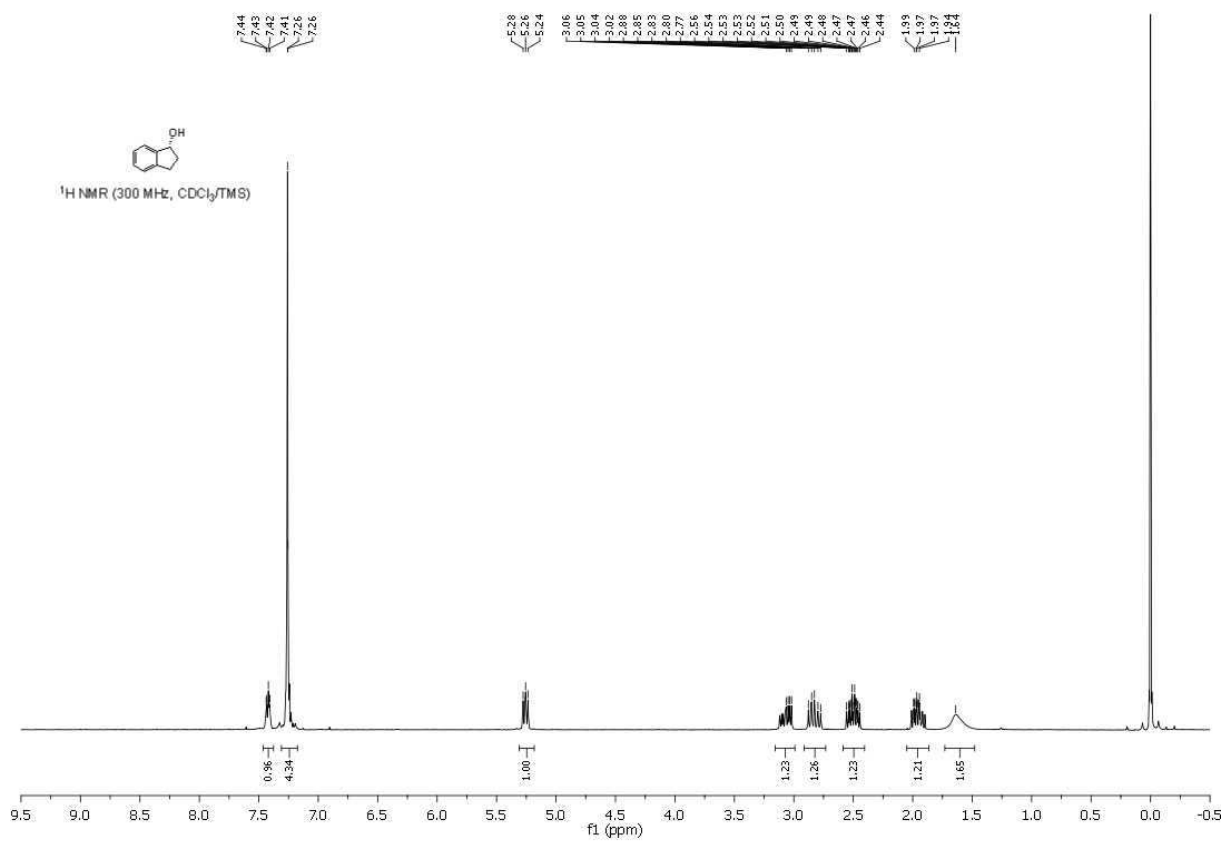

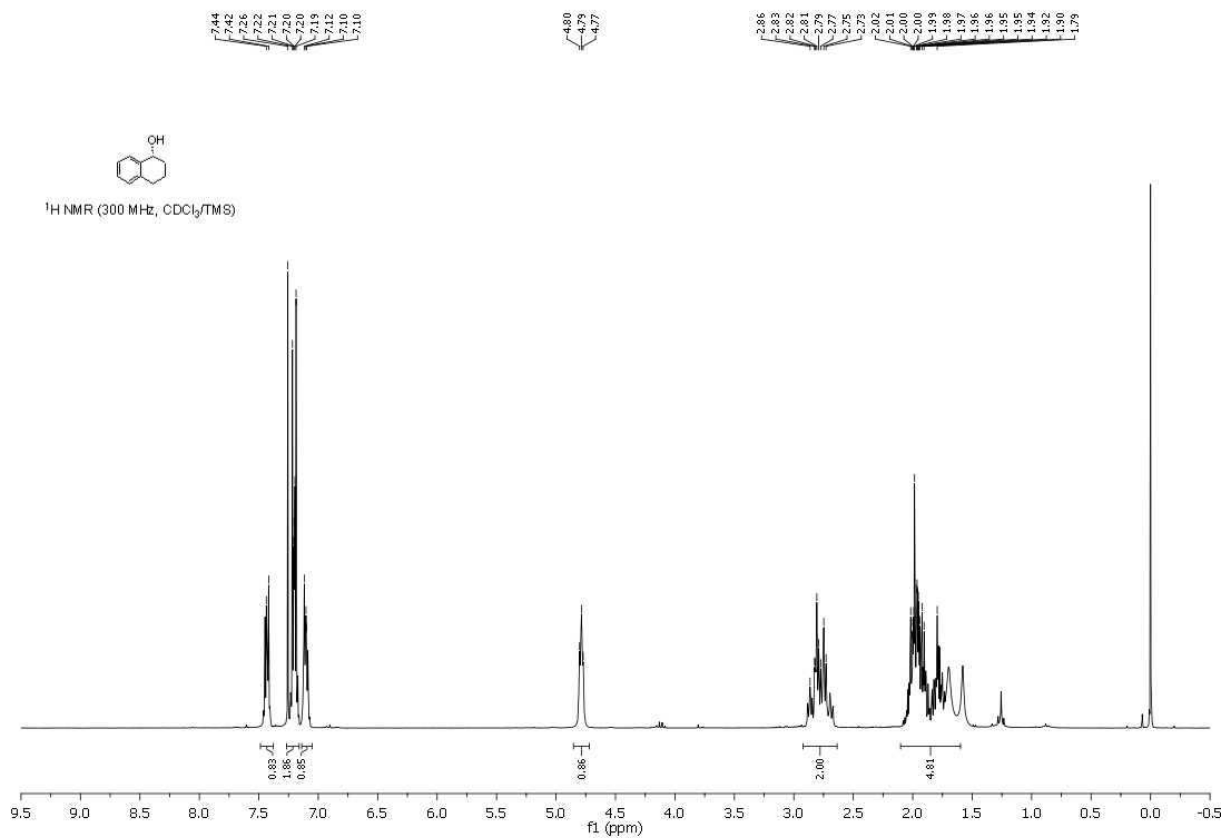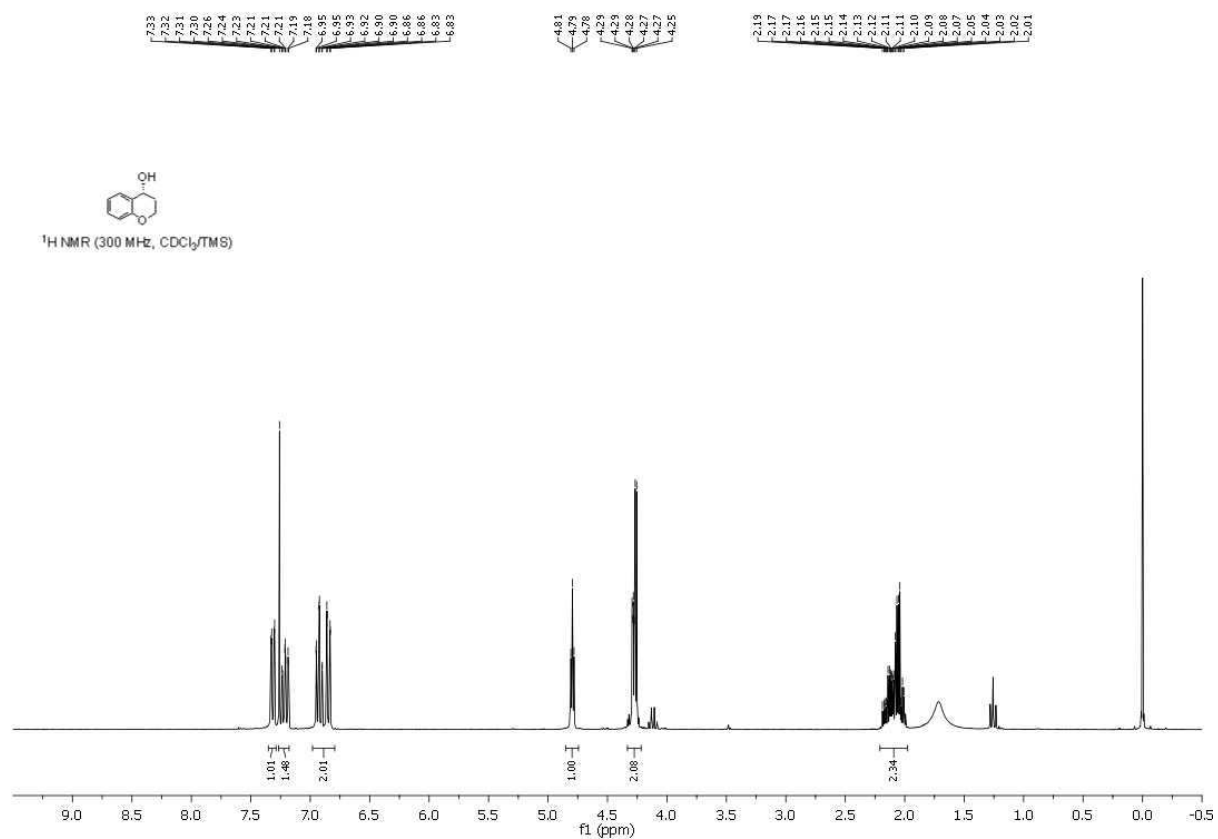

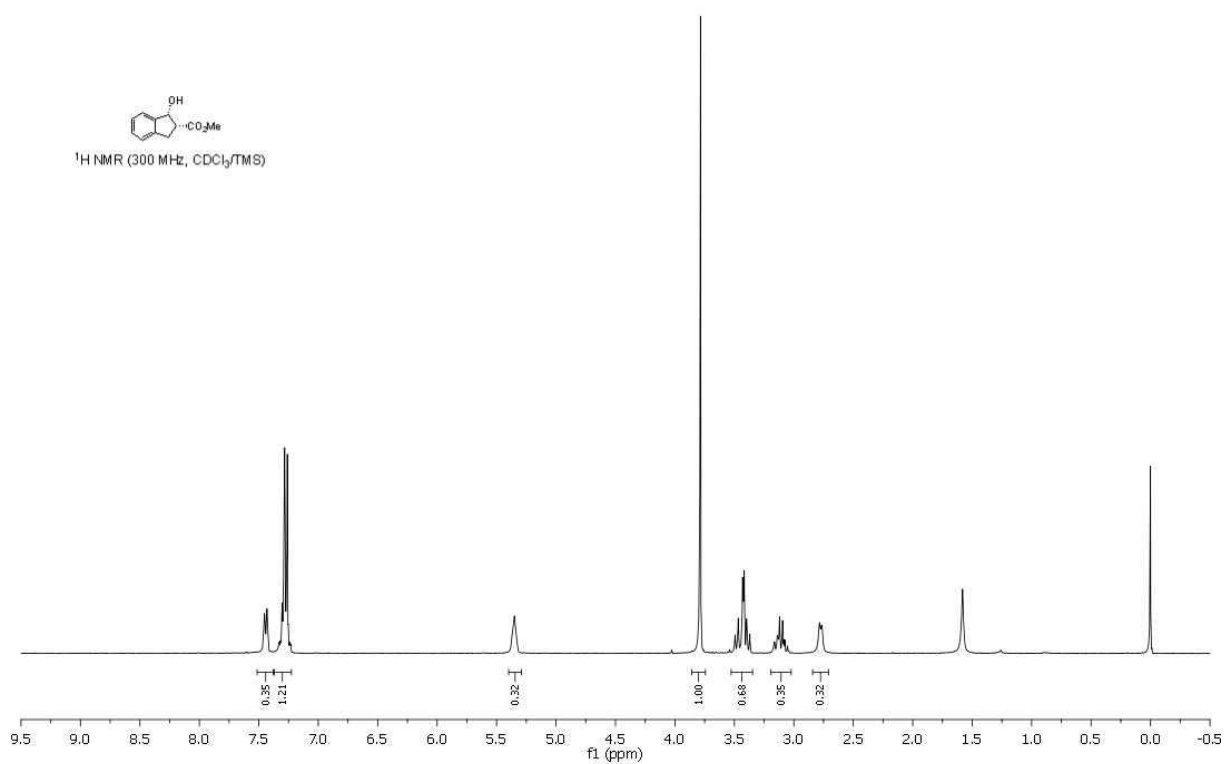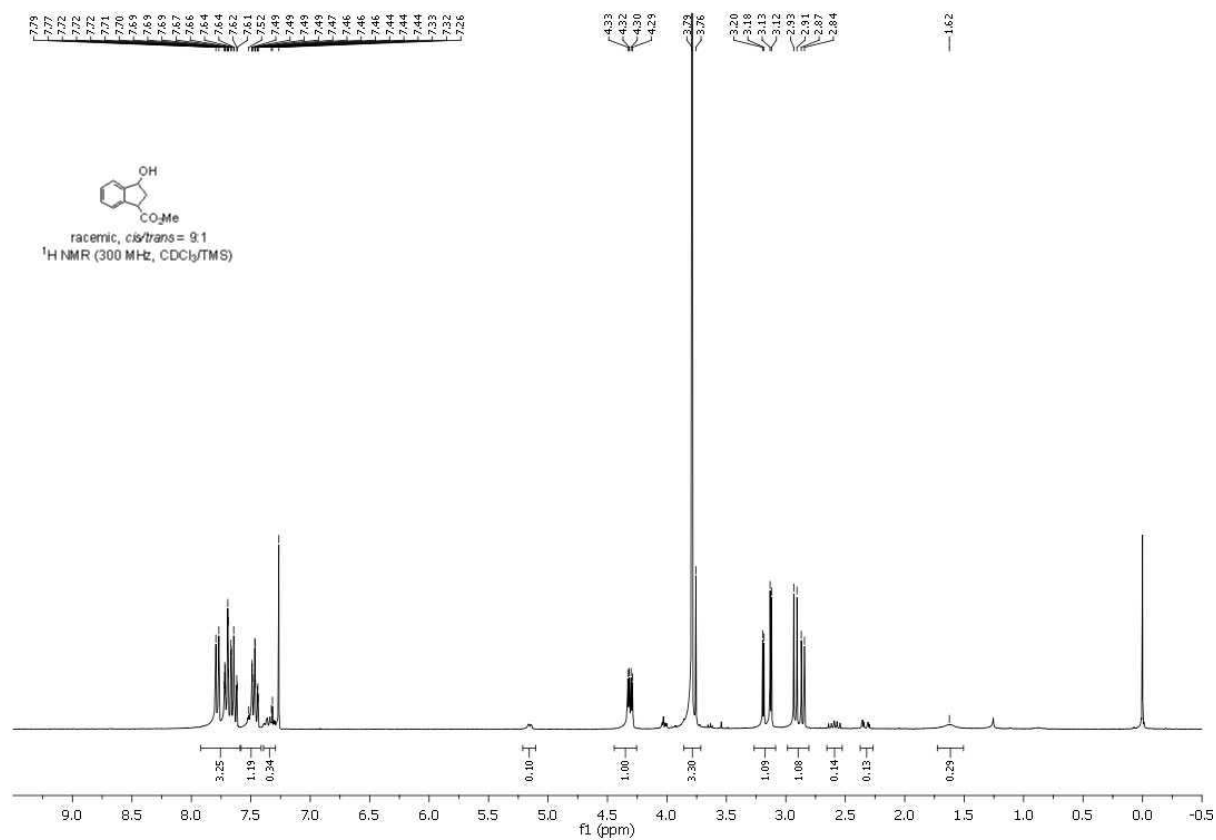



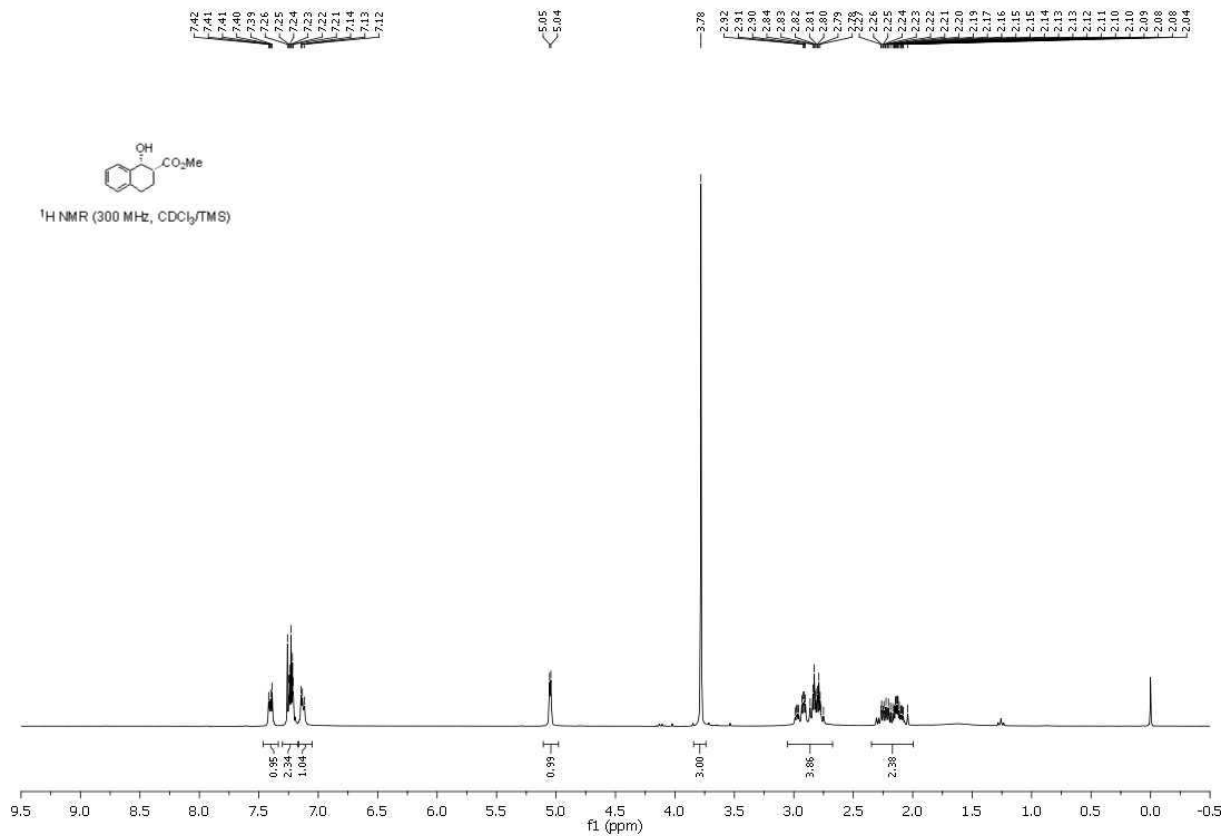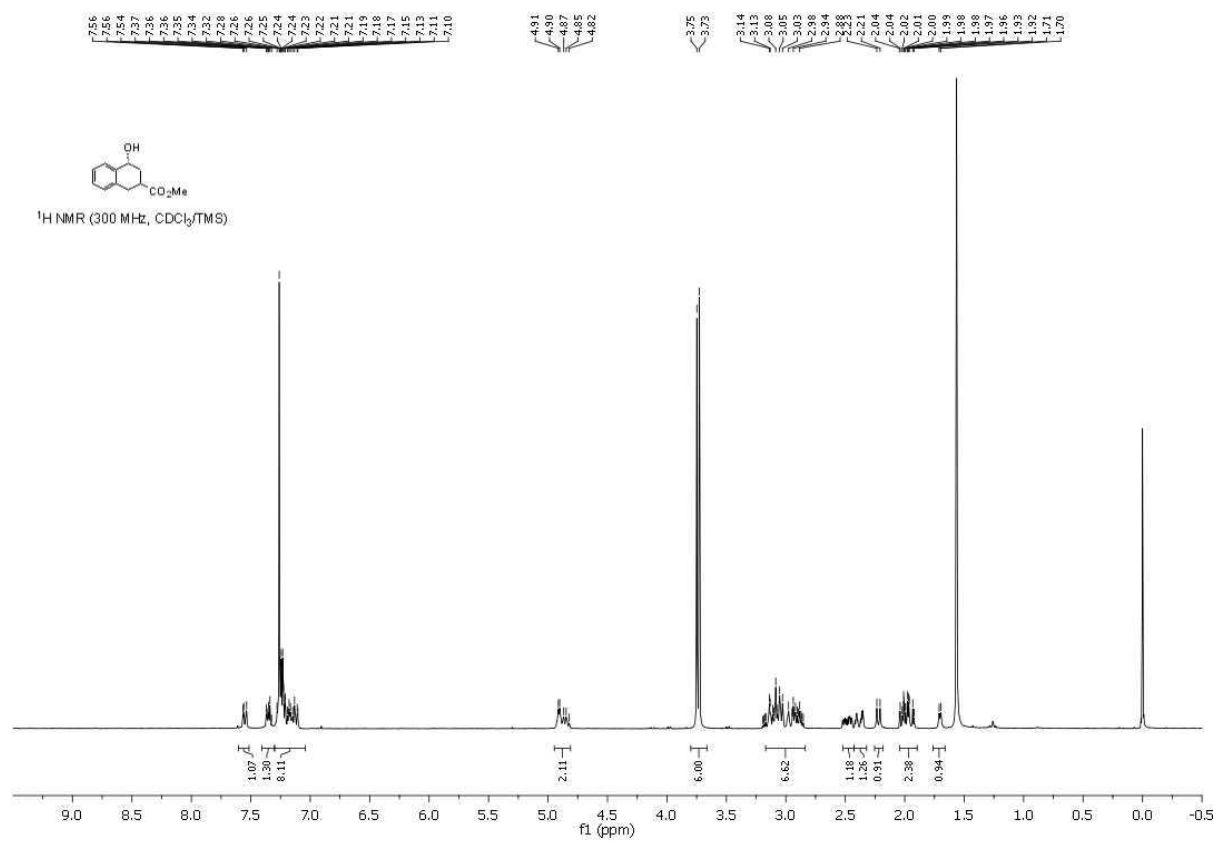

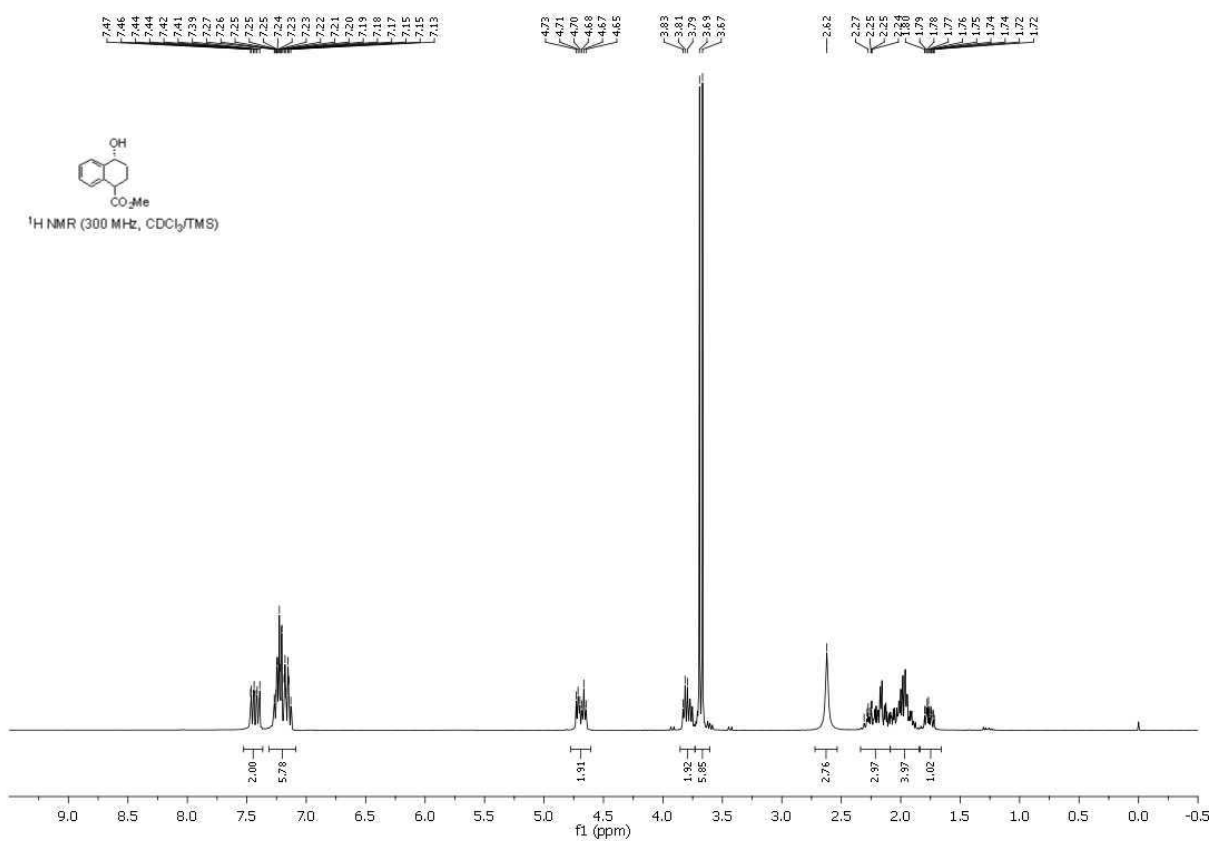

#### 4. $^1\text{H}$ , $^{13}\text{C}$ -HMBC analysis of *trans*-4

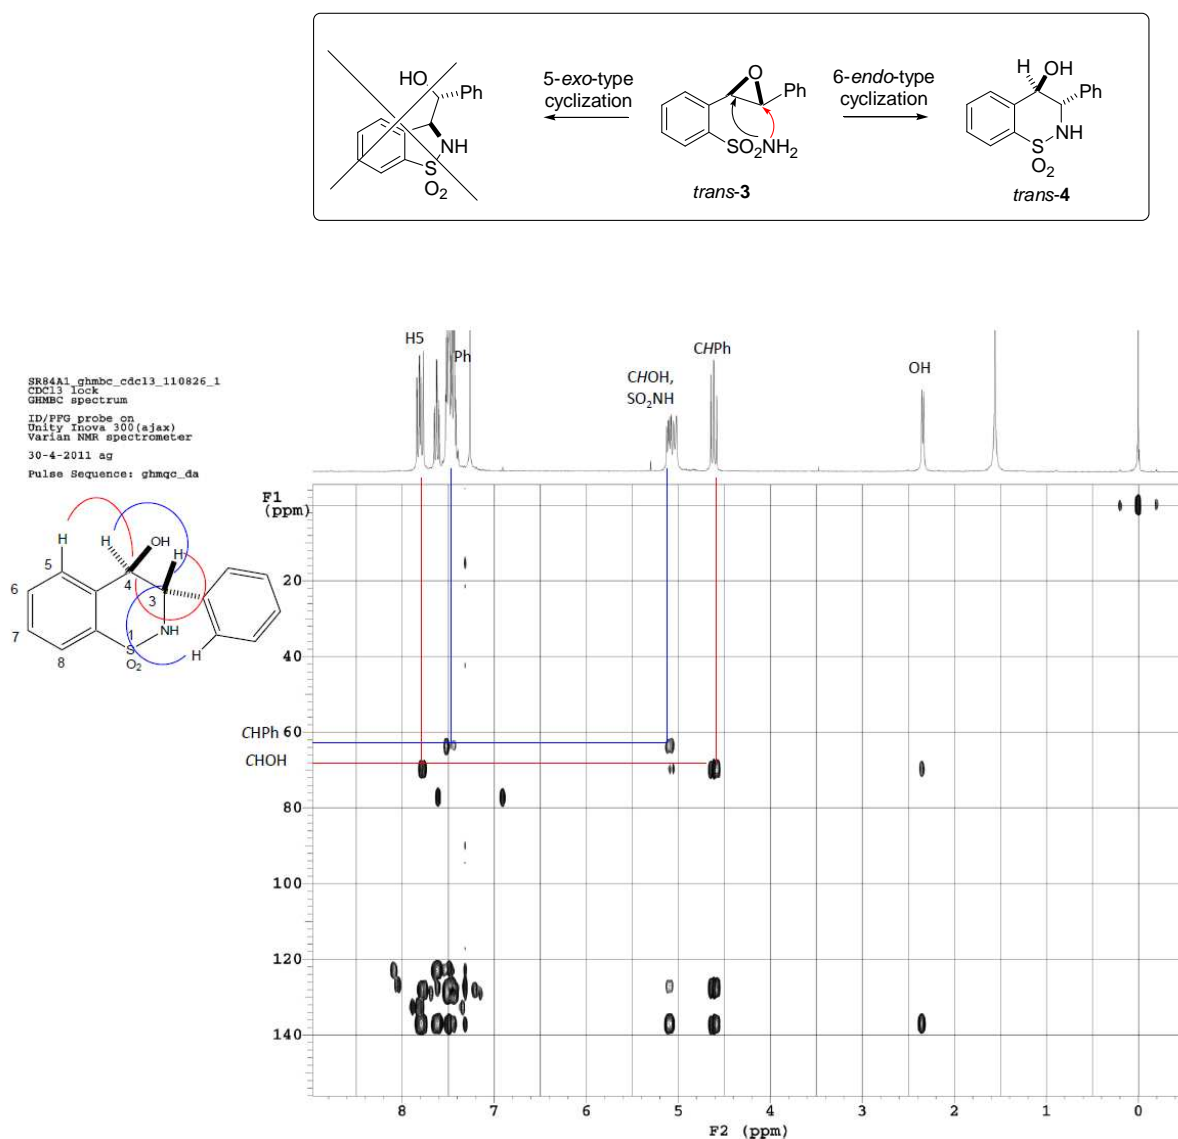

**Fig. S7** 6-endo-*tet*- vs. 5-exo-*tet*-type cyclization of *trans*-3;  $^1\text{H}$ ,  $^{13}\text{C}$ -HMBC analysis revealing chemical shift correlation between the marked proximal aromatic hydrogen of the 1,1-dioxo-2-phenyl-2,3-dihydro-1,2-thiazinane core and the carbon atom bearing the hydroxyl group.

## 5. $^1\text{H}$ , $^{13}\text{C}$ -HMBC analysis of *syn*-6

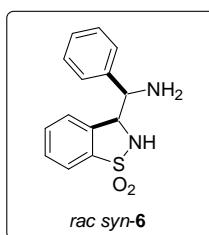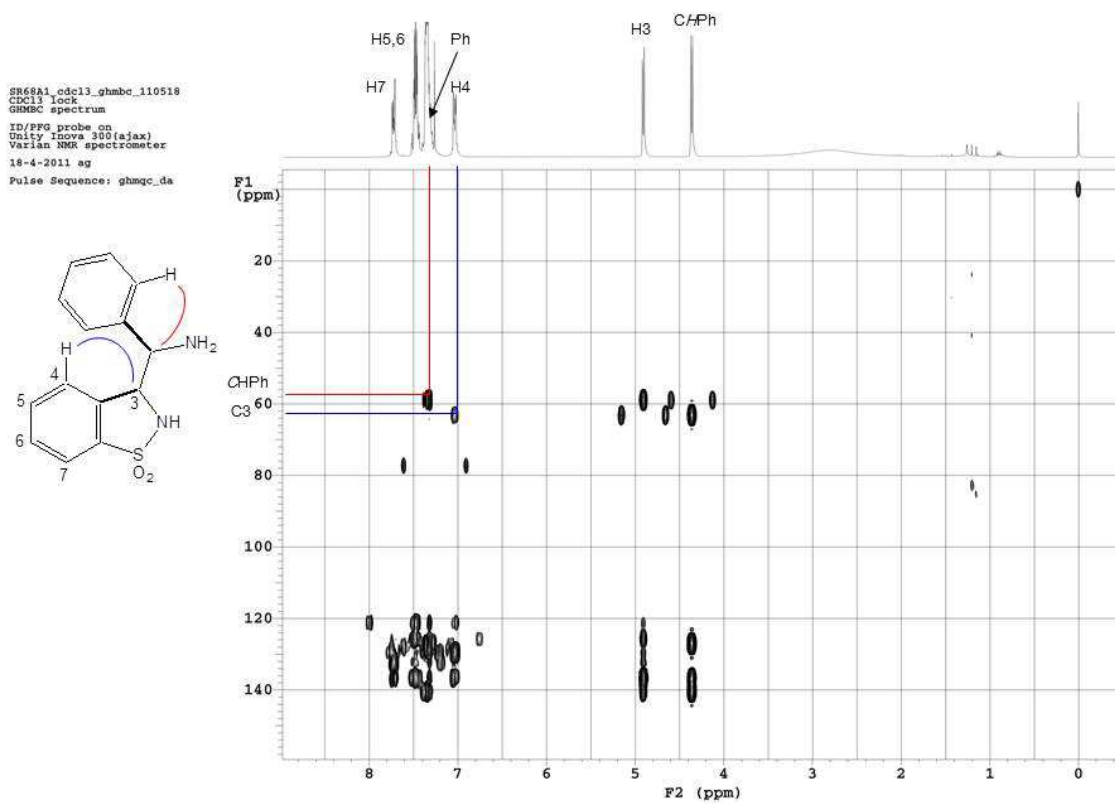

**Fig. S8**  $^1\text{H}$ ,  $^{13}\text{C}$ -HMBC analysis of *syn*-6 revealing chemical shift correlation between the marked proximal aromatic hydrogen of the 1,1-dioxo-benzo-1,2-thiazolidine core and the carbon atom bearing the  $\alpha$ -aminobenzyl group.
